# Supplementary material for: Sesquiterpene and Sorbicillinoid Glycosides from the Endophytic Fungus Trichoderma longibrachiatum EN-586 Derived from the Marine Red Alga Laurencia obtusa
Source: MDPI journal article supplement (doi:10.3390/md20030177), 2022-02-28
Supplement: s1 [file s1]

## Supporting Information

### Sesquiterpene and Sorbicillinoid Glycosides from the Endophytic

### Fungus *Trichoderma longibrachiatum* EN-586 Derived from the

### Marine Red Alga *Laurencia obtusa*

Ying Wang,<sup>†,‡,§</sup> Xiao-Ming Li,<sup>†,‡</sup> Sui-Qun Yang,<sup>†,‡</sup> Fan-Zhong Zhang,<sup>†,‡</sup> Bin-Gui

Wang,<sup>†,‡,§,⊥</sup> Hong-Lei Li,<sup>\*,†,‡</sup> and Ling-Hong Meng,<sup>\*,†,‡,§</sup>

<sup>†</sup>CAS and Shandong Province Key Laboratory of Experimental Marine Biology, Institute of Oceanology, Chinese Academy of Sciences, Nanhai Road 7, Qingdao 266071, People's Republic of China

<sup>‡</sup>Laboratory of Marine Biology and Biotechnology, Qingdao National Laboratory for Marine Science and Technology, Wenhai Road 1, Qingdao 266237, People's Republic of China

<sup>§</sup>University of Chinese Academy of Sciences, Yuquan Road 19A, Beijing 100049, People's Republic of China

<sup>⊥</sup>Center for Ocean Mega-Science, Chinese Academy of Sciences, Nanhai Road 7, Qingdao 266071, People's Republic of China

### Corresponding Authors

\*Phone (H.-L. Li): +86-532-82898890. E-mail: lihonglei@qdio.ac.cn.

\*Phone (L.-H. Meng): +86-532-82898890. E-mail: menglh@ms.qdio.ac.cn.

## Contents

- Figure S1.  $^1\text{H}$  NMR (500 MHz,  $\text{DMSO-}d_6$ ) spectrum of compound **1**;
- Figure S2.  $^{13}\text{C}$  NMR (125 MHz,  $\text{DMSO-}d_6$ ) and DEPT spectra of compound **1**;
- Figure S3. COSY spectrum of compound **1**;
- Figure S4. HSQC spectrum of compound **1**;
- Figure S5a. HMBC spectrum of compound **1**;
- Figure S5b. Enlarged HMBC spectrum of compound **1** (lower field);
- Figure S5c. Enlarged HMBC spectrum of compound **1** (higher field);
- Figure S6. NOESY spectrum of compound **1**;
- Figure S7. HRESIMS spectrum of compound **1**;
- Figure S8.  $^1\text{H}$  NMR (500 MHz,  $\text{DMSO-}d_6$ ) spectrum of compound **2**;
- Figure S9.  $^{13}\text{C}$  NMR (125 MHz,  $\text{DMSO-}d_6$ ) and DEPT spectra of compound **2**;
- Figure S10. COSY spectrum of compound **2**;
- Figure S11. HSQC spectrum of compound **2**;
- Figure S12. HMBC spectrum of compound **2**;
- Figure S13. NOESY spectrum of compound **2**;
- Figure S14. HRESIMS spectrum of compound **2**;
- Figure S15. ECD spectrum of compound **2**;
- Figure S16.  $^1\text{H}$  NMR (500 MHz,  $\text{DMSO-}d_6$ ) spectrum of compound **3**;
- Figure S17.  $^{13}\text{C}$  NMR (125 MHz,  $\text{DMSO-}d_6$ ) and DEPT spectra of compound **3**;
- Figure S18. COSY spectrum of compound **3**;
- Figure S19. HSQC spectrum of compound **3**;
- Figure S20. HMBC spectrum of compound **3**;
- Figure S21. NOESY spectrum of compound **3**;
- Figure S22. HRESIMS spectrum of compound **3**;
- Figure S23. ECD spectrum of compound **3**;
- Figure S24. Determination of absolute configuration of glucosamine in compound **1**;
- Figure S25. DP4+ probability Excel sheets of compound **1**;
- Figure S26. Determination of absolute configuration of ribose in compound **3**;

Figure S1.  $^1\text{H}$  NMR (500 MHz,  $\text{DMSO-}d_6$ ) spectrum of compound **1**;

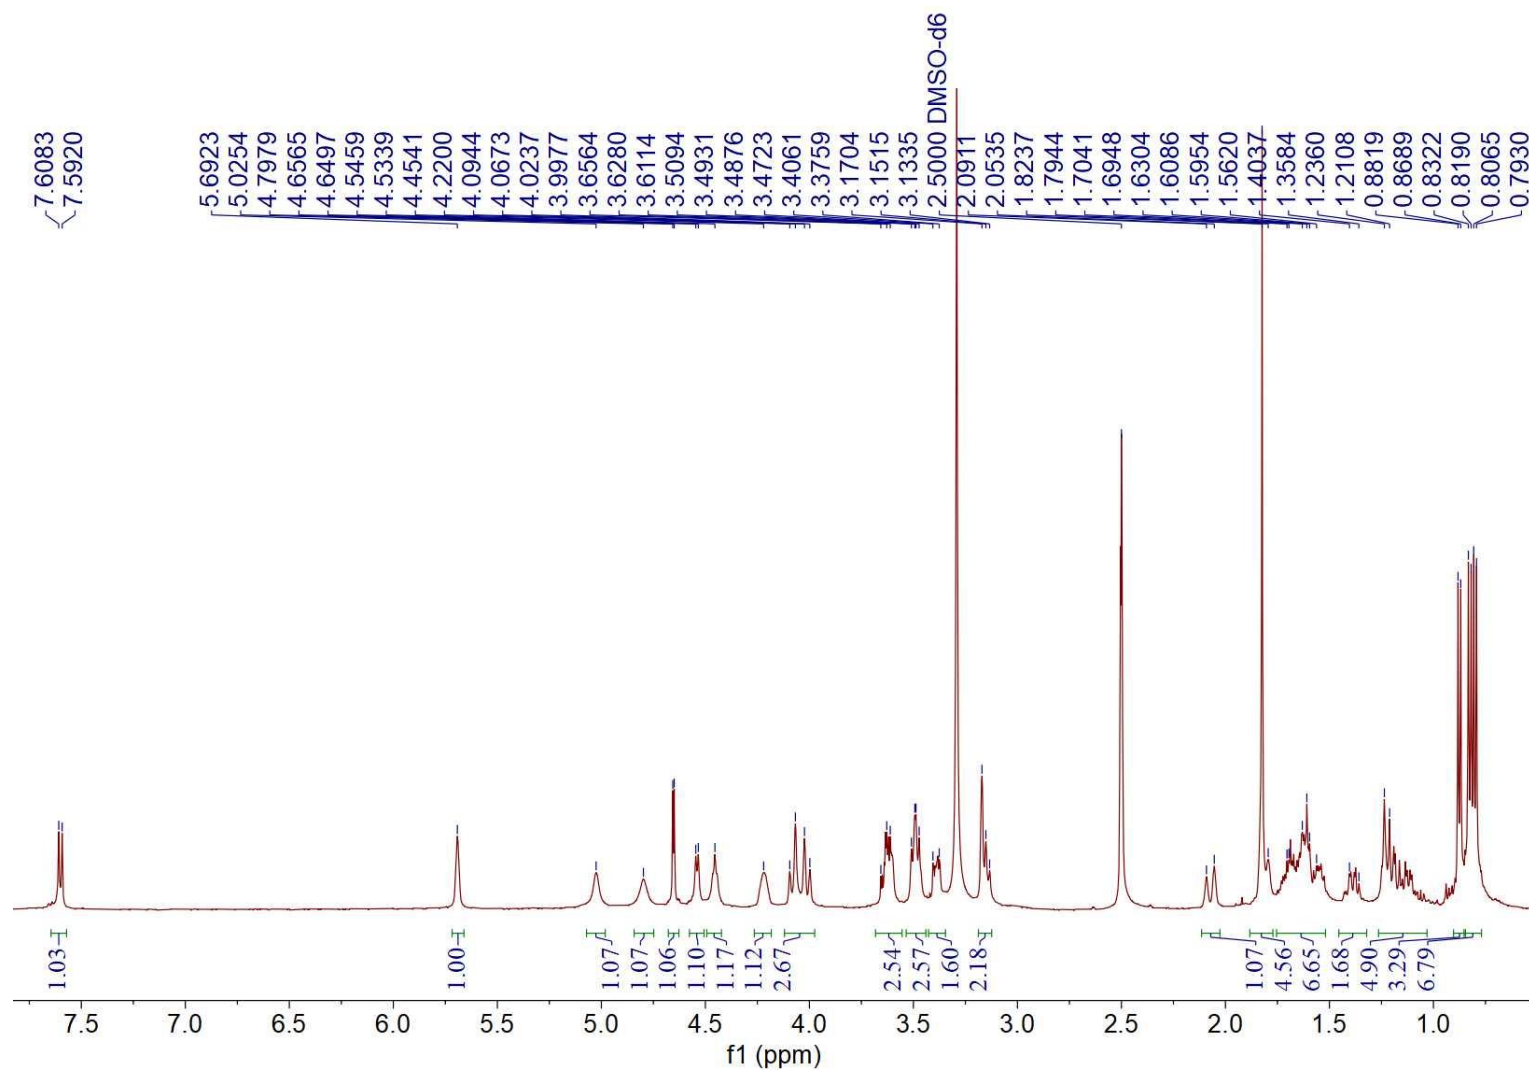

Figure S2.  $^{13}\text{C}$  NMR (125 MHz,  $\text{DMSO-}d_6$ ) and DEPT spectra of compound **1**;

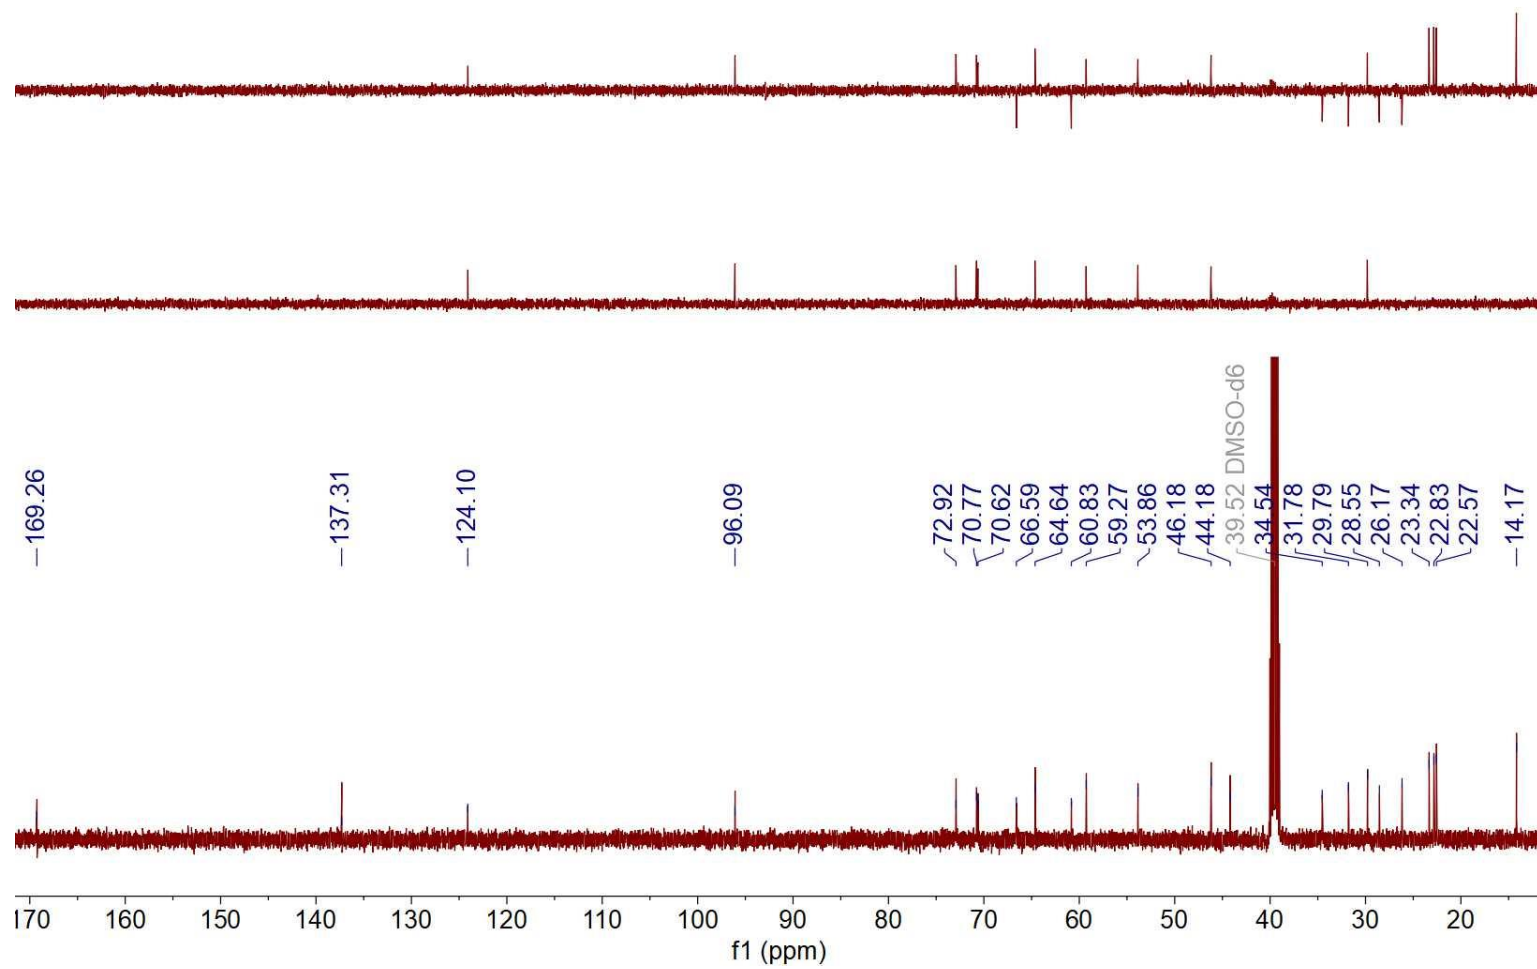

Figure S3. COSY spectrum of compound **1**;

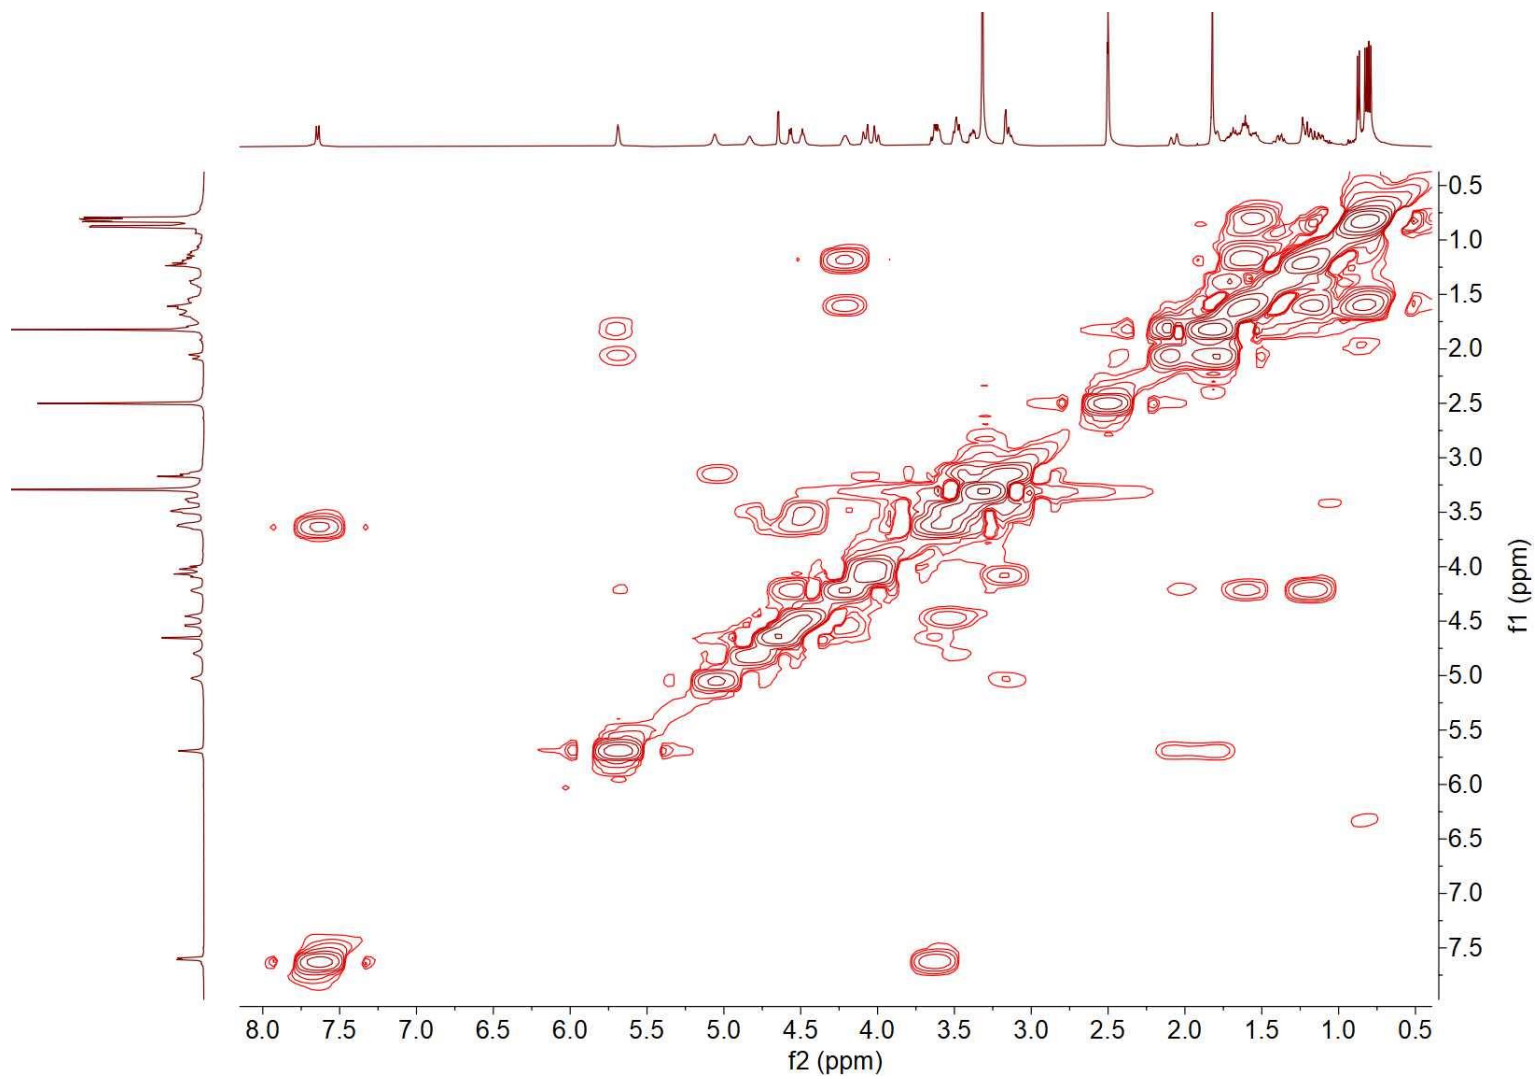

Figure S4. HSQC spectrum of compound **1**;

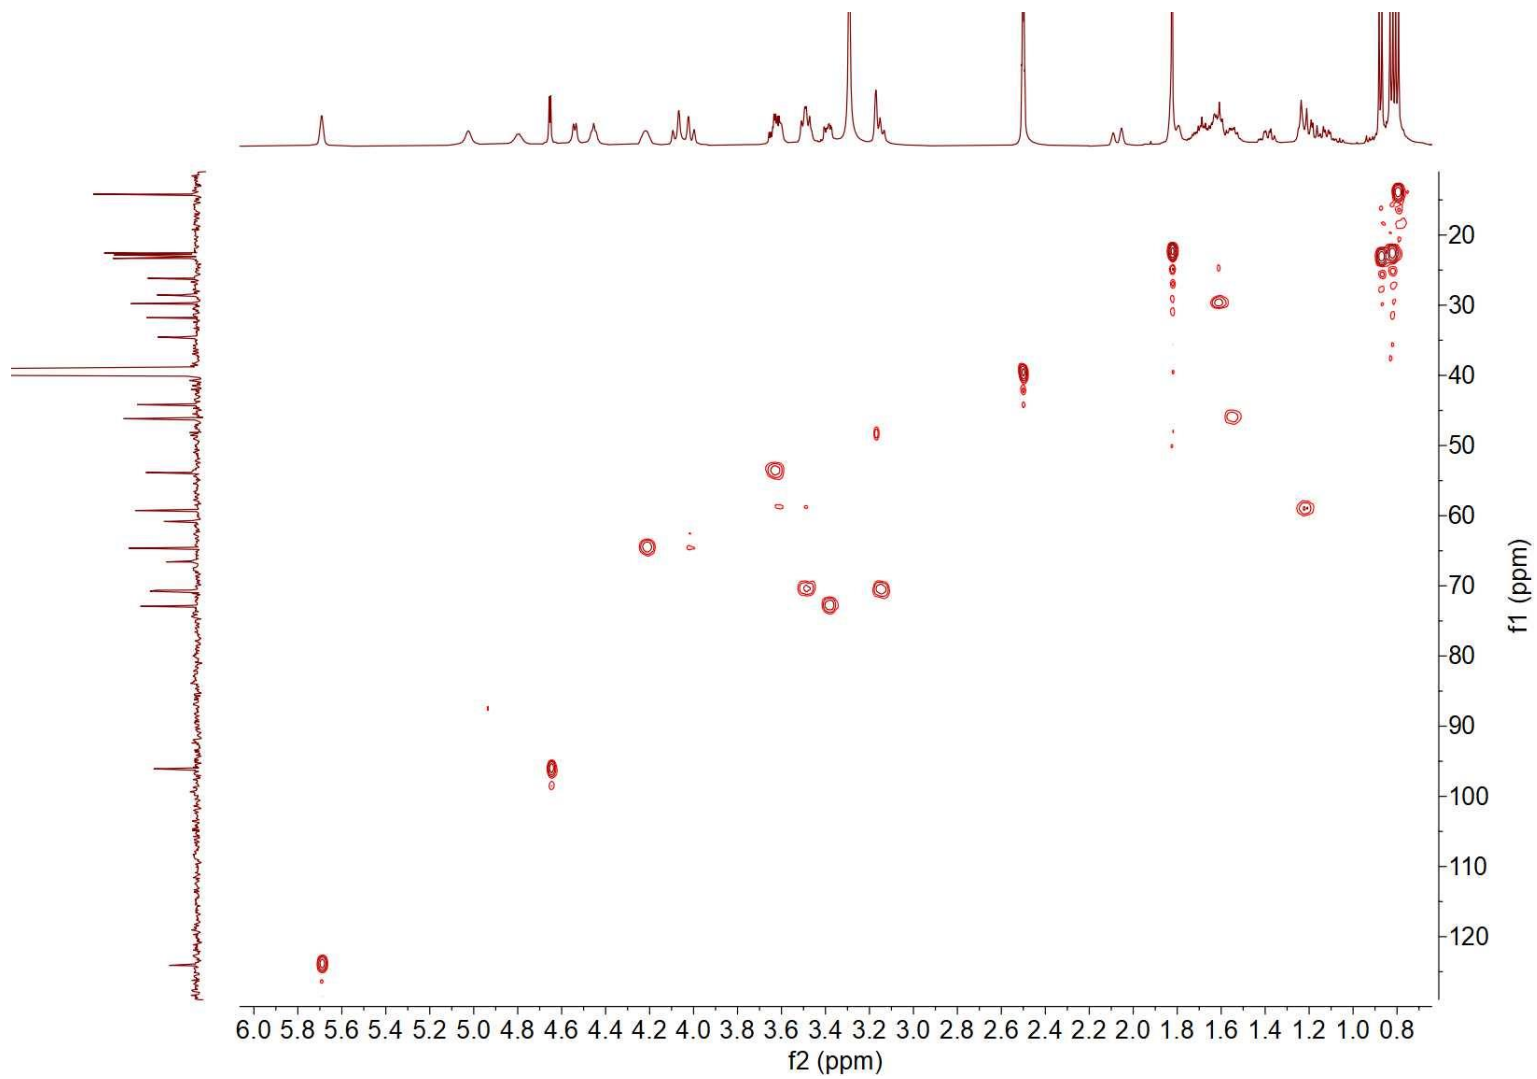

Figure S5a. HMBC spectrum of compound **1**;

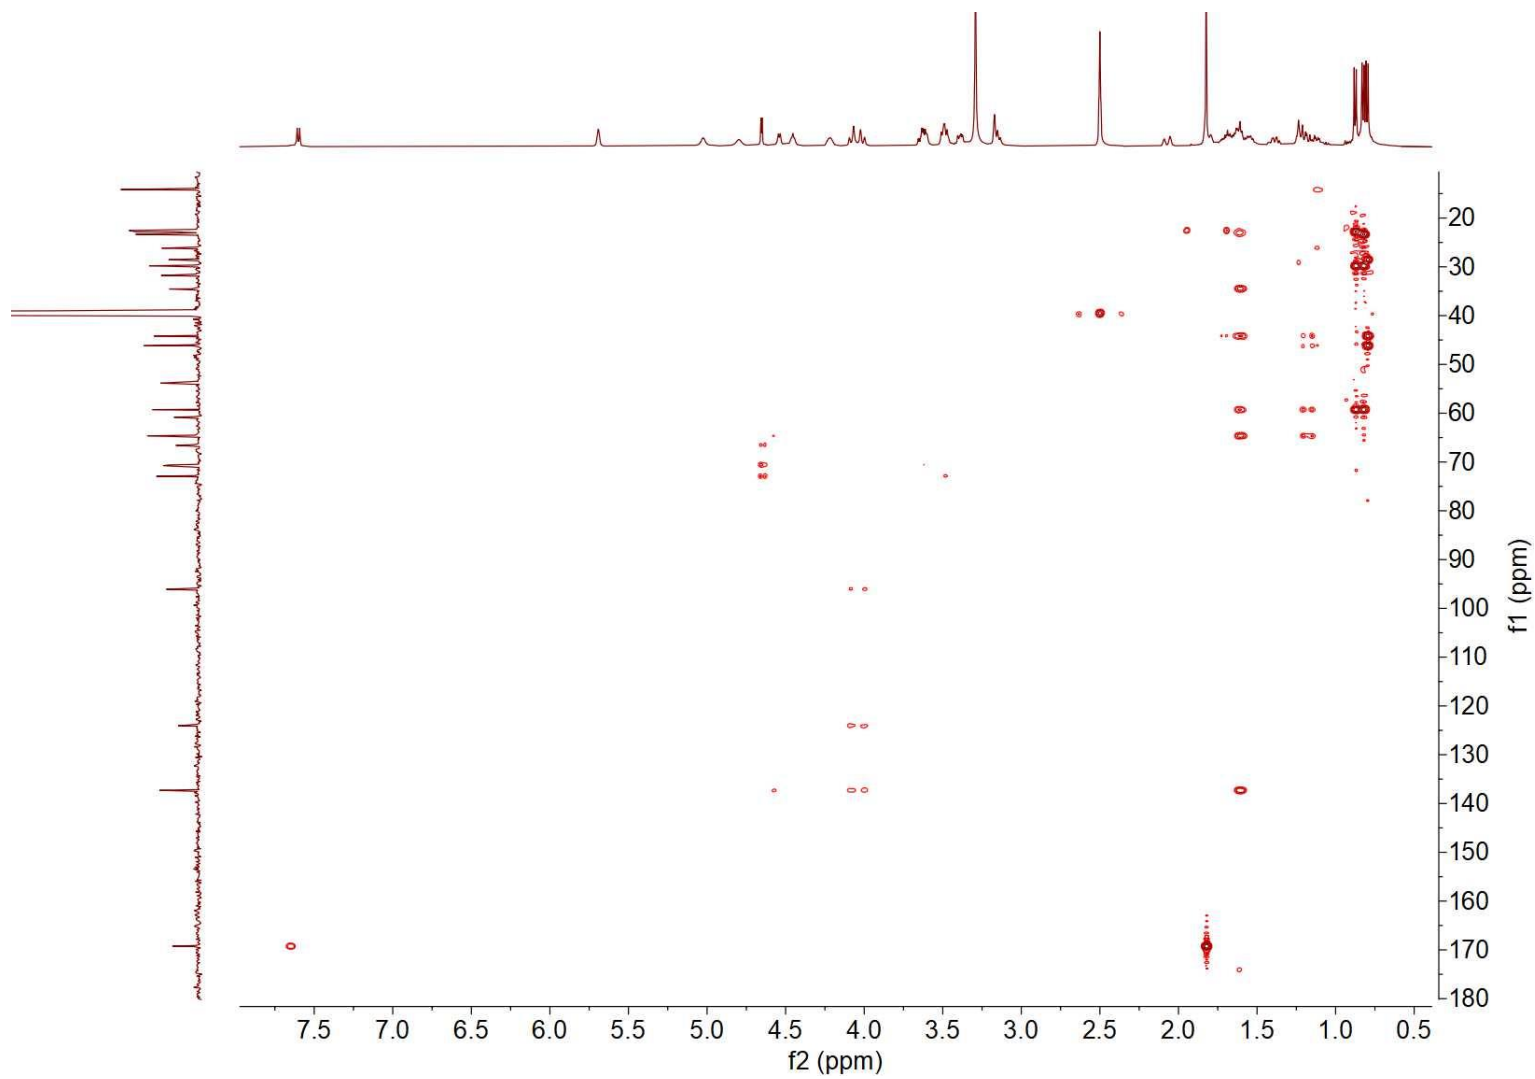

Figure S5b. Enlarged HMBC spectrum of compound **1** (lower field);

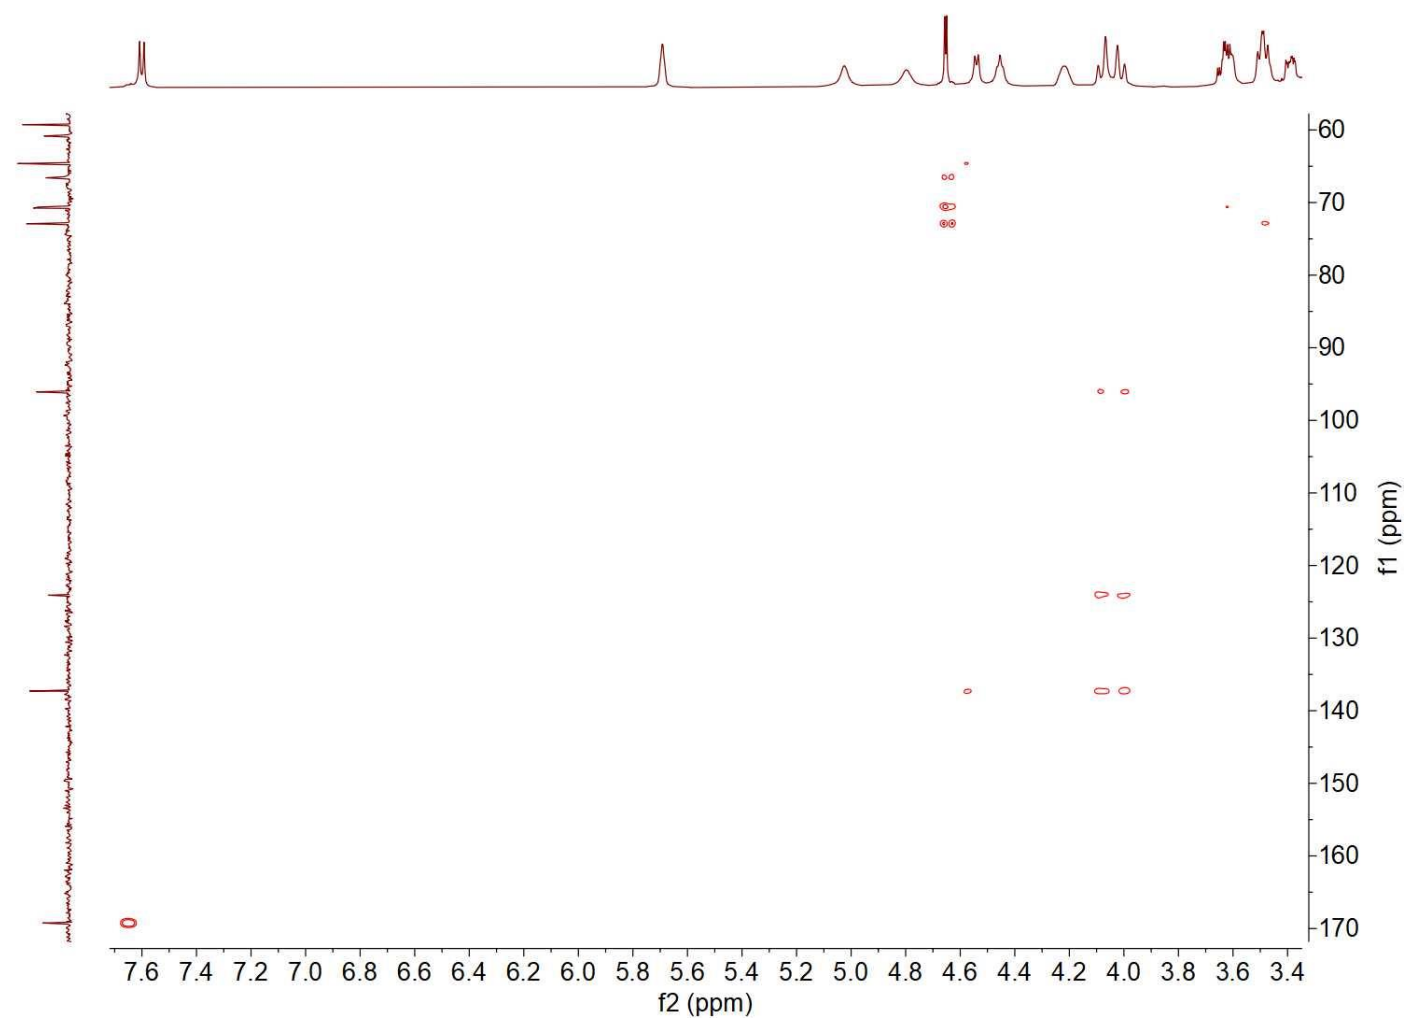



Figure S5c. Enlarged HMBC spectrum of compound **1** (higher field);

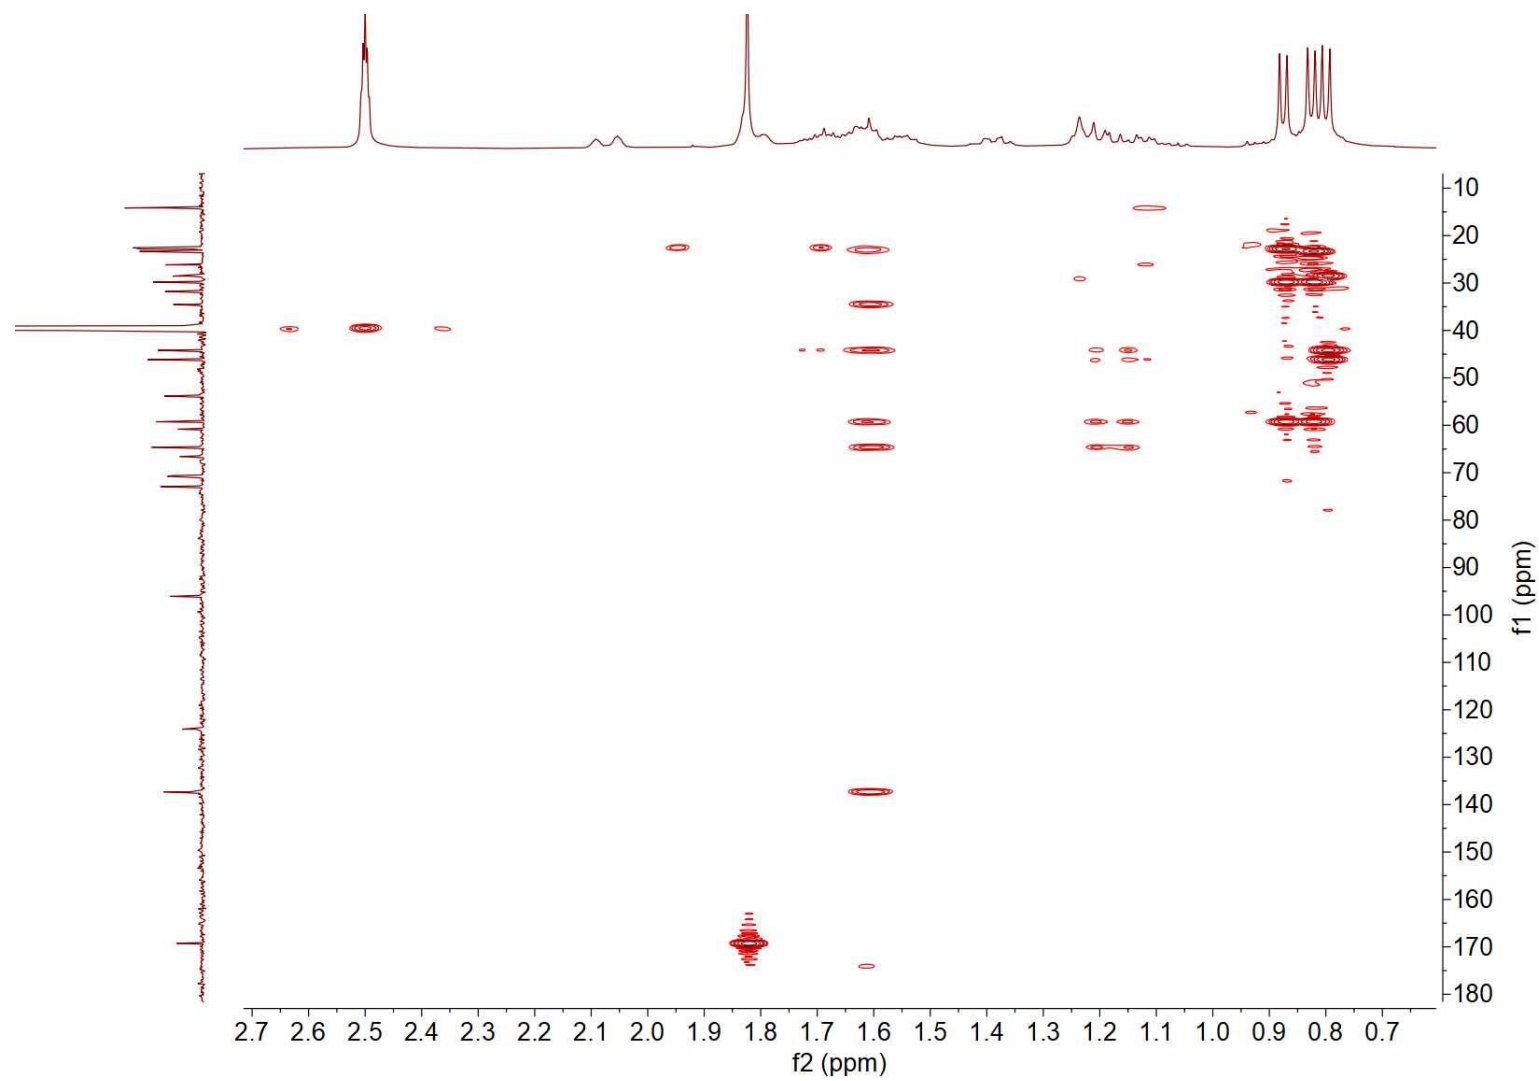

Figure S6. NOESY spectrum of compound **1**;

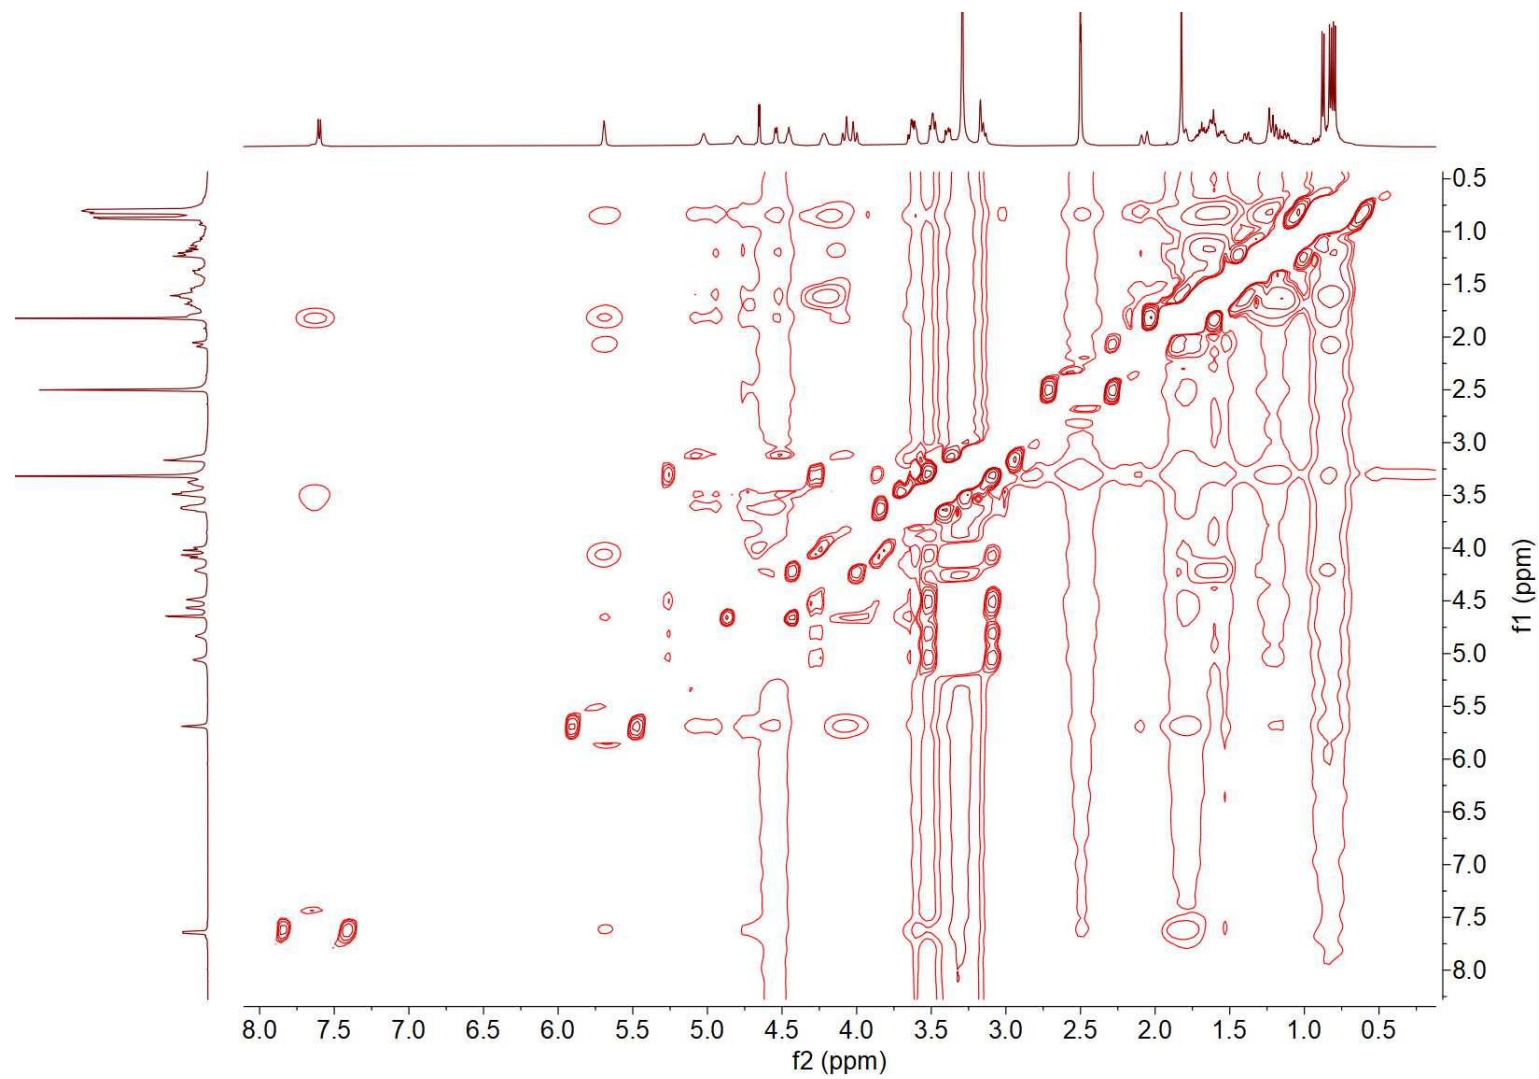

Figure S7. HRESIMS spectrum of compound **1**;

20210927-EN586M-21\_210927082648 #46 RT: 0.39 AV: 1 NL: 6.65E7  
T: FTMS + p ESI Full ms [150.00-1500.00]

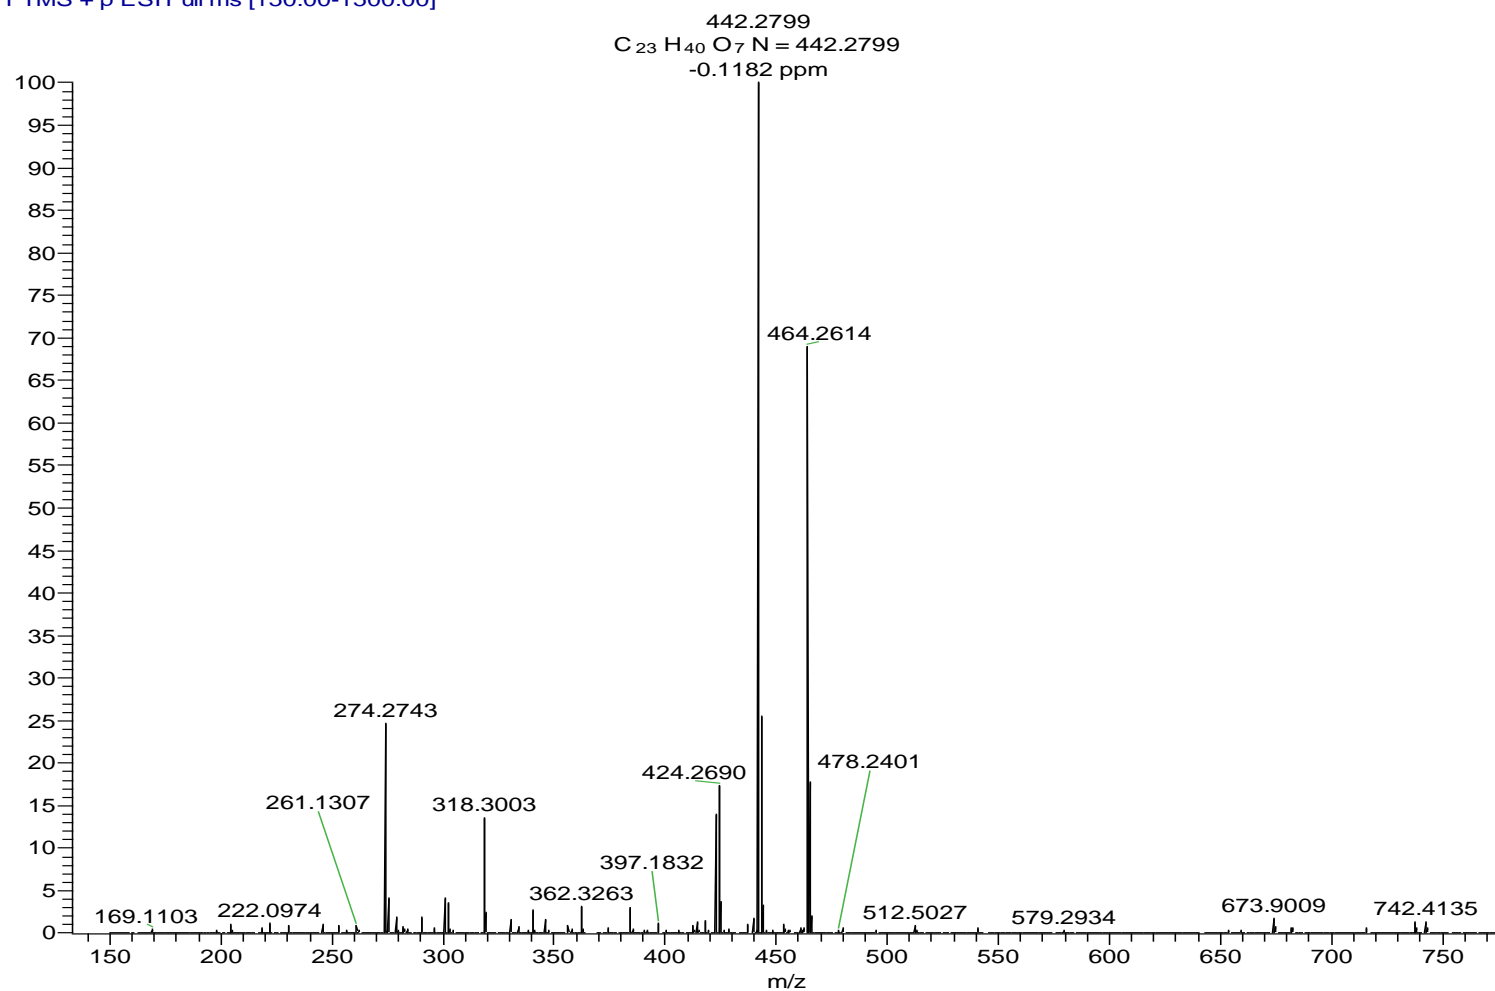

Figure S8.  $^1\text{H}$  NMR (500 MHz,  $\text{DMSO}-d_6$ ) spectrum of compound **2**;

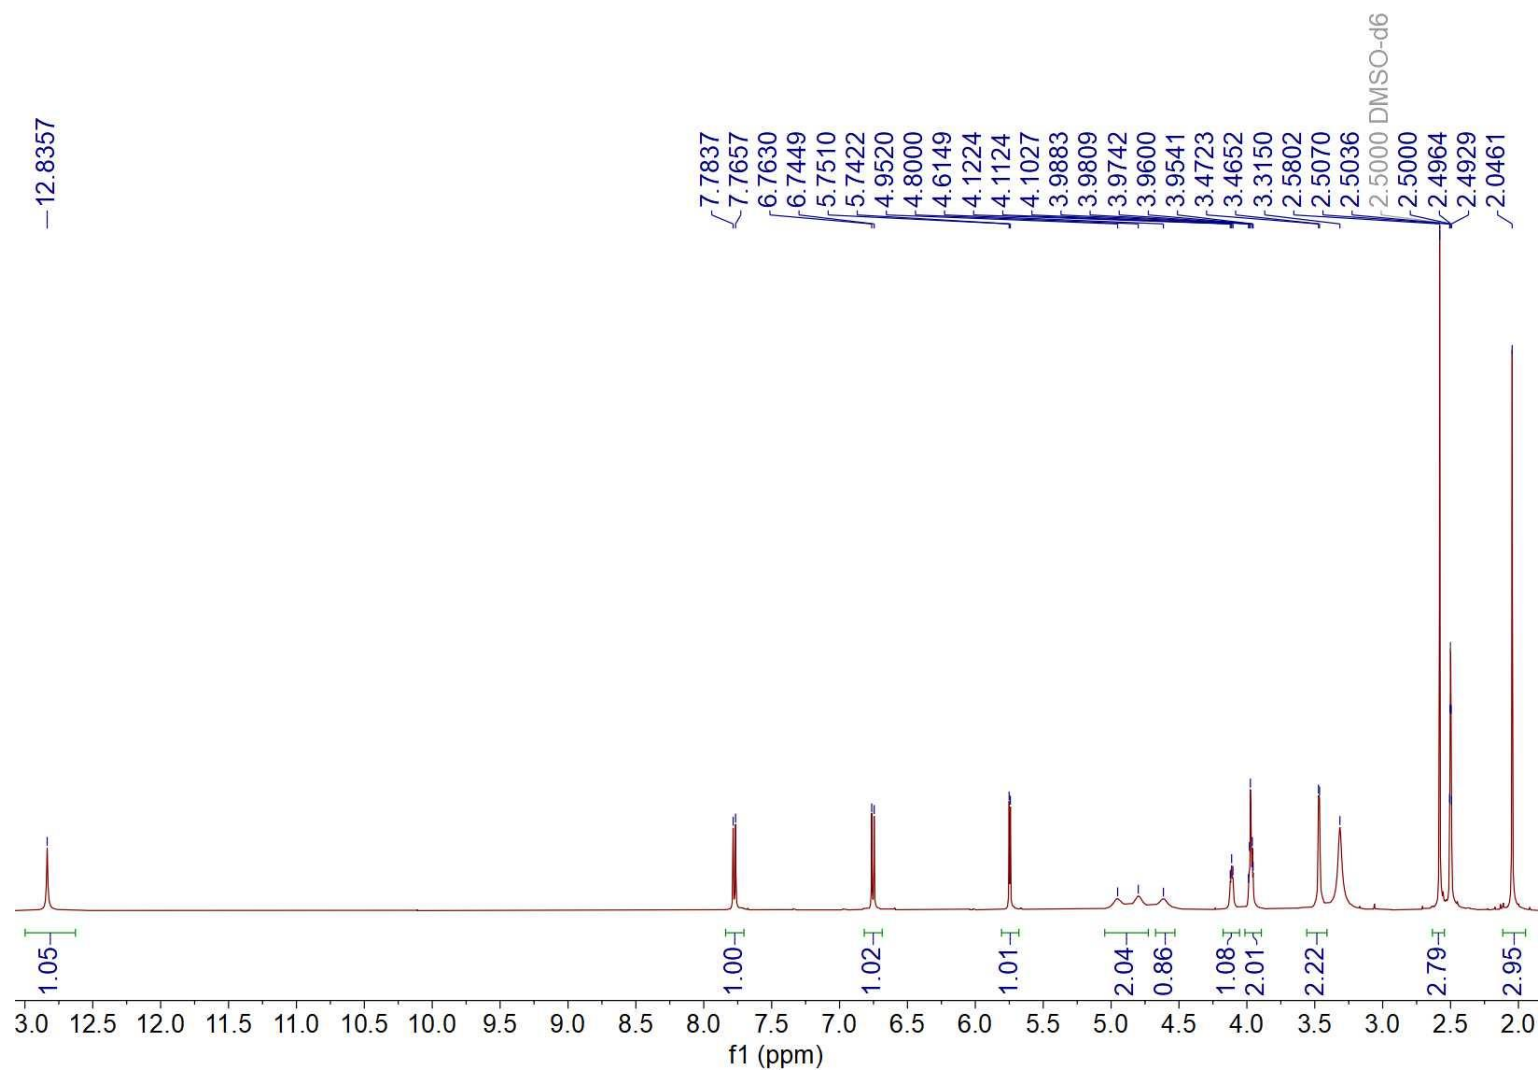

Figure S9.  $^{13}\text{C}$  NMR (125 MHz,  $\text{DMSO-}d_6$ ) and DEPT spectra of compound **2**;

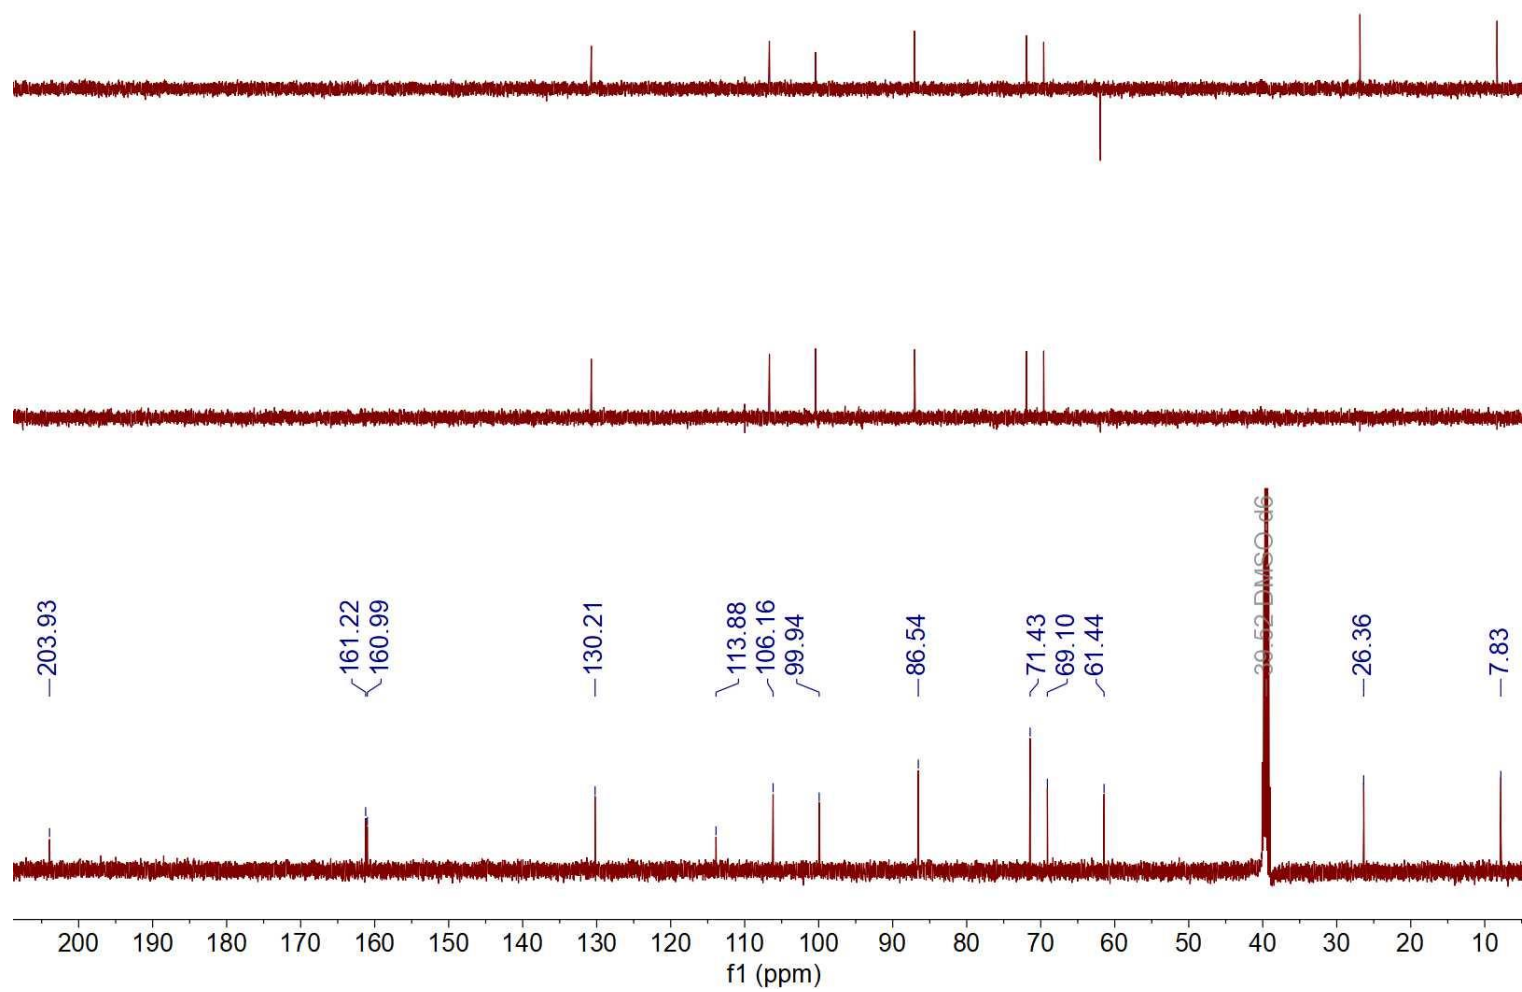

Figure S10. COSY spectrum of compound **2**;

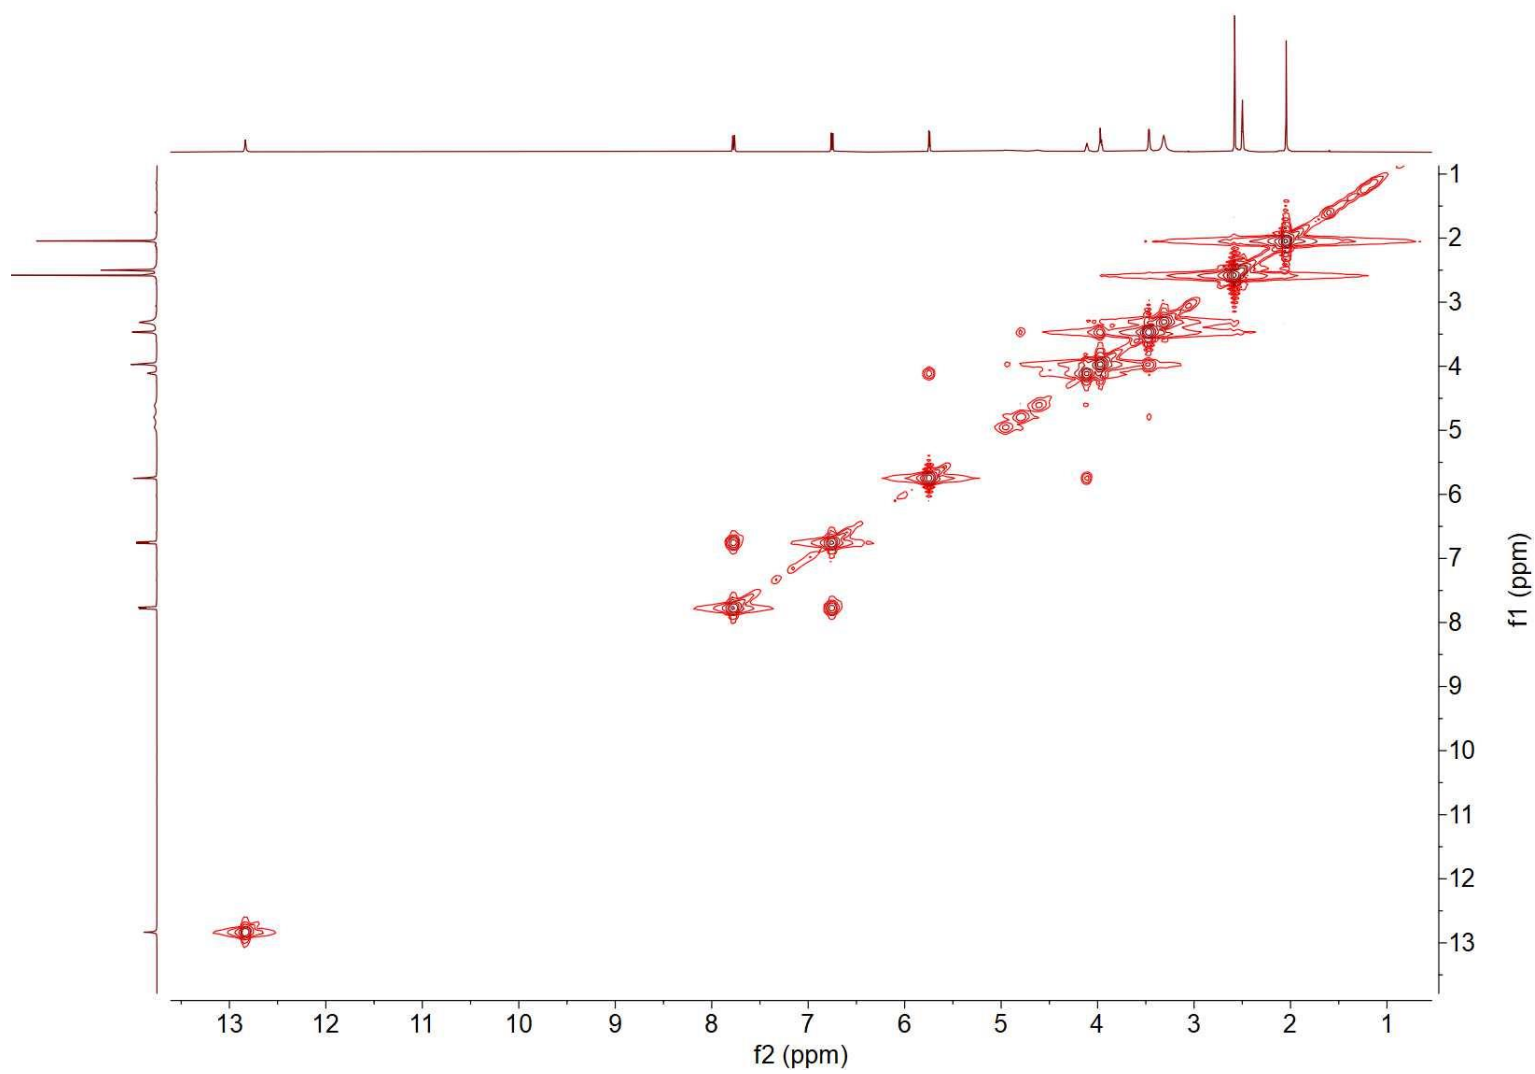

Figure S11. HSQC spectrum of compound **2**;

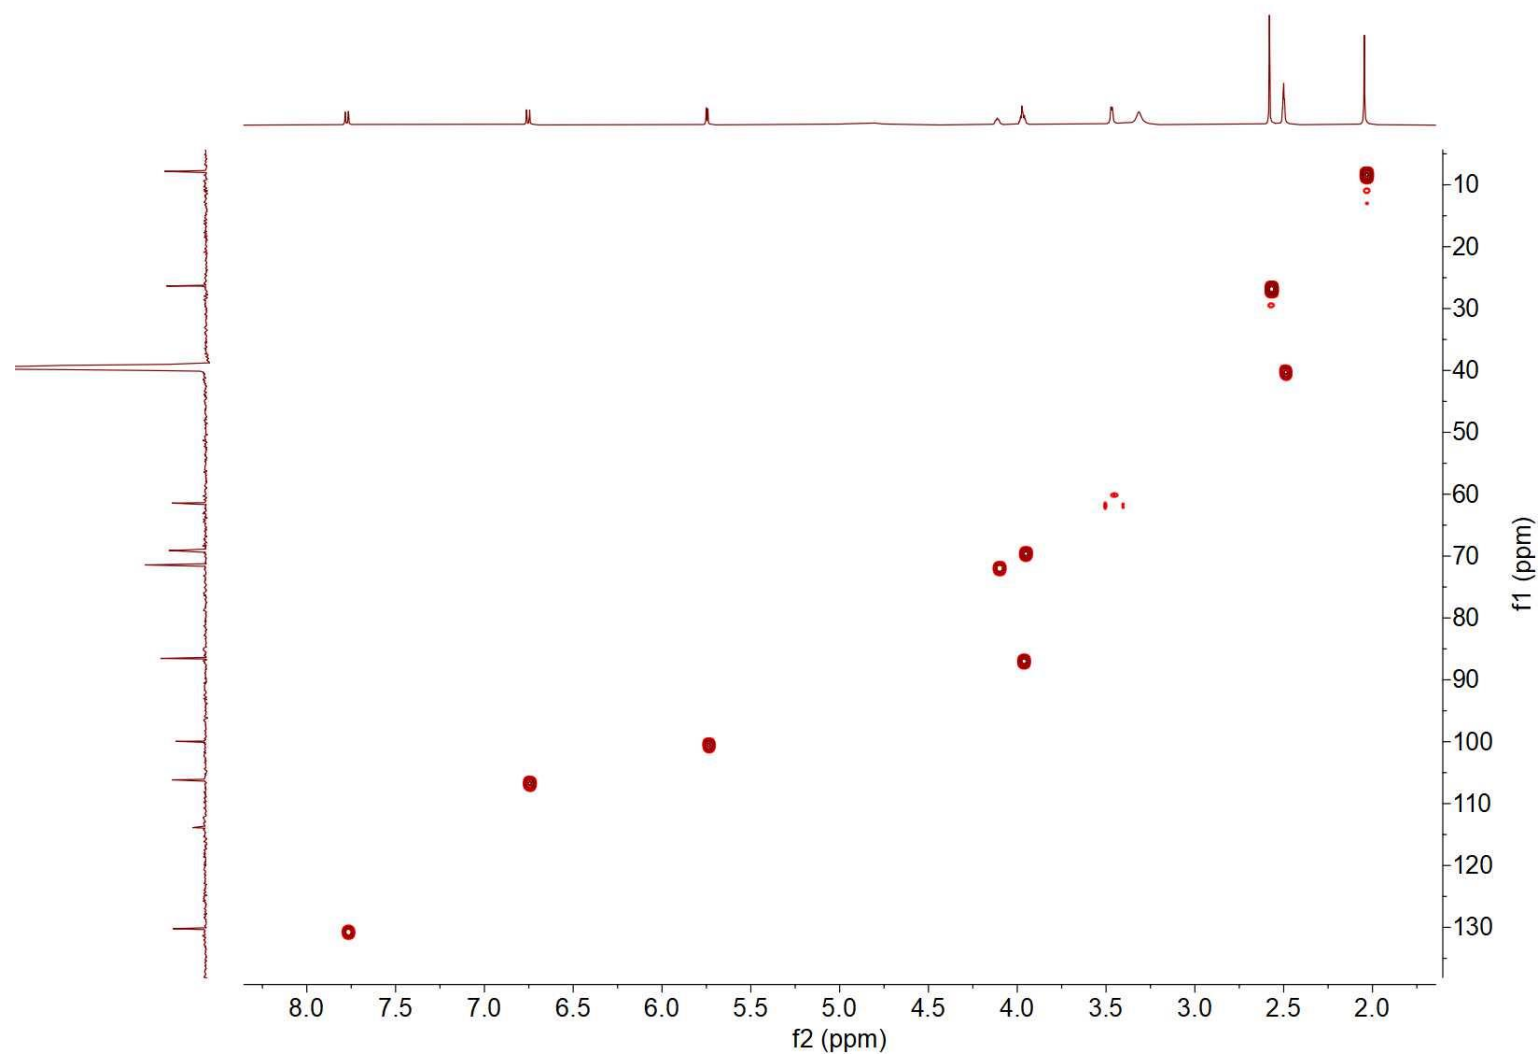

Figure S12. HMBC spectrum of compound **2**;

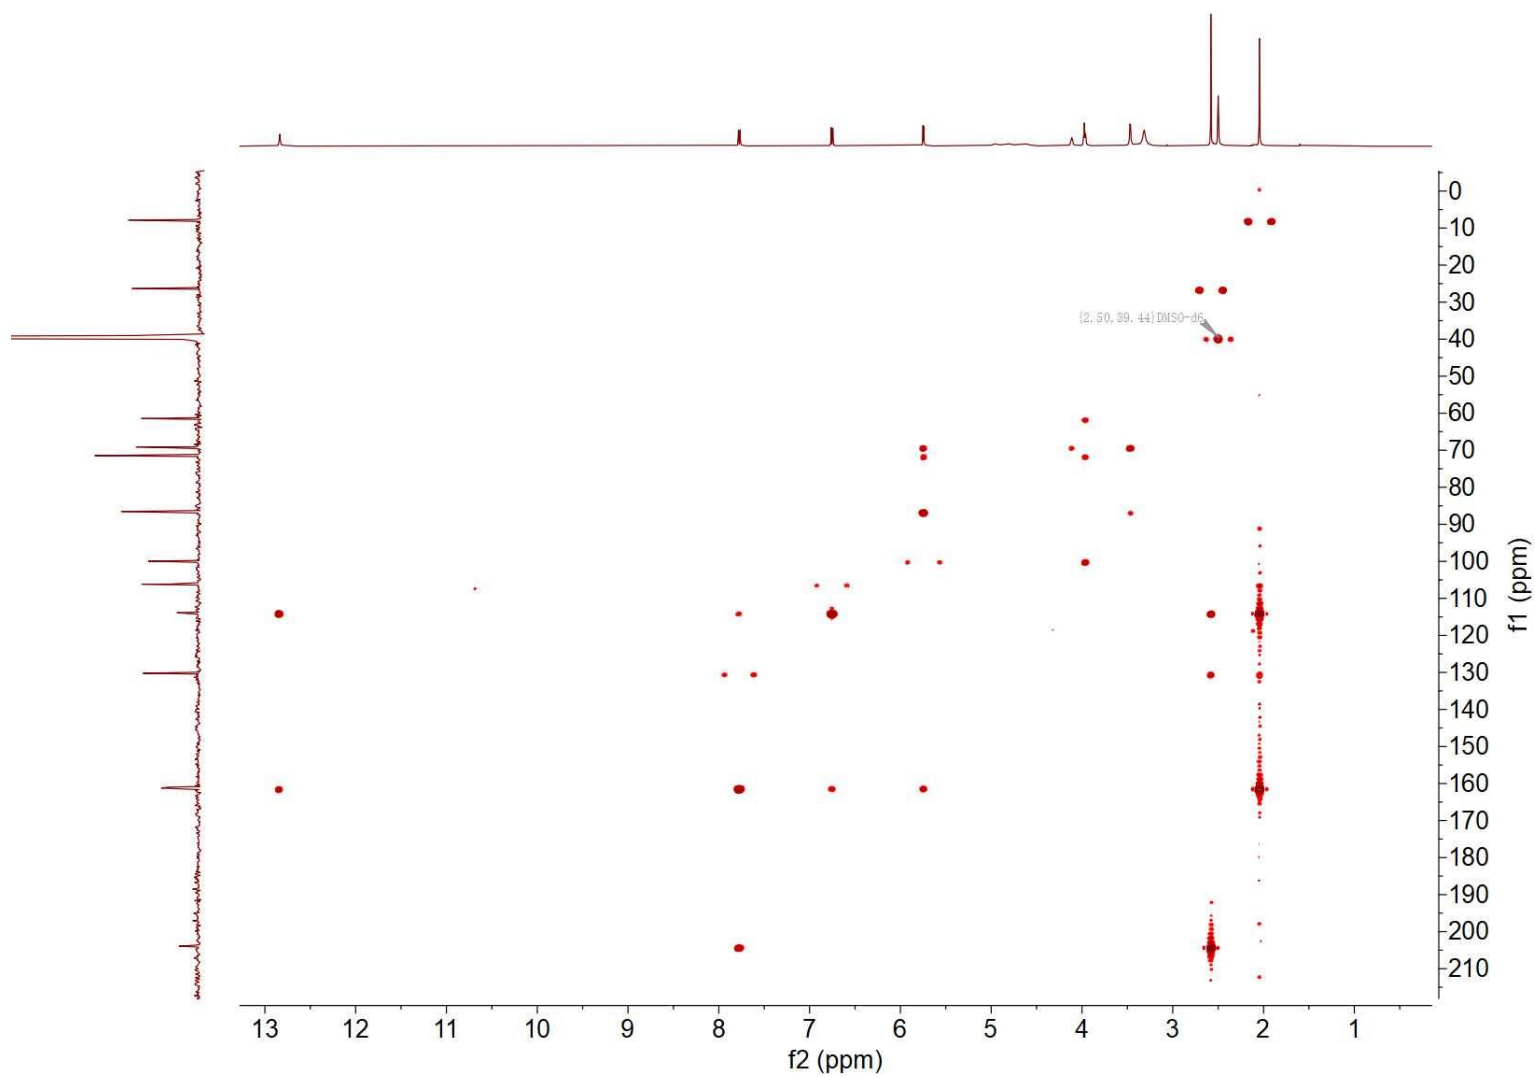



Figure S13. NOESY spectrum of compound **2**;

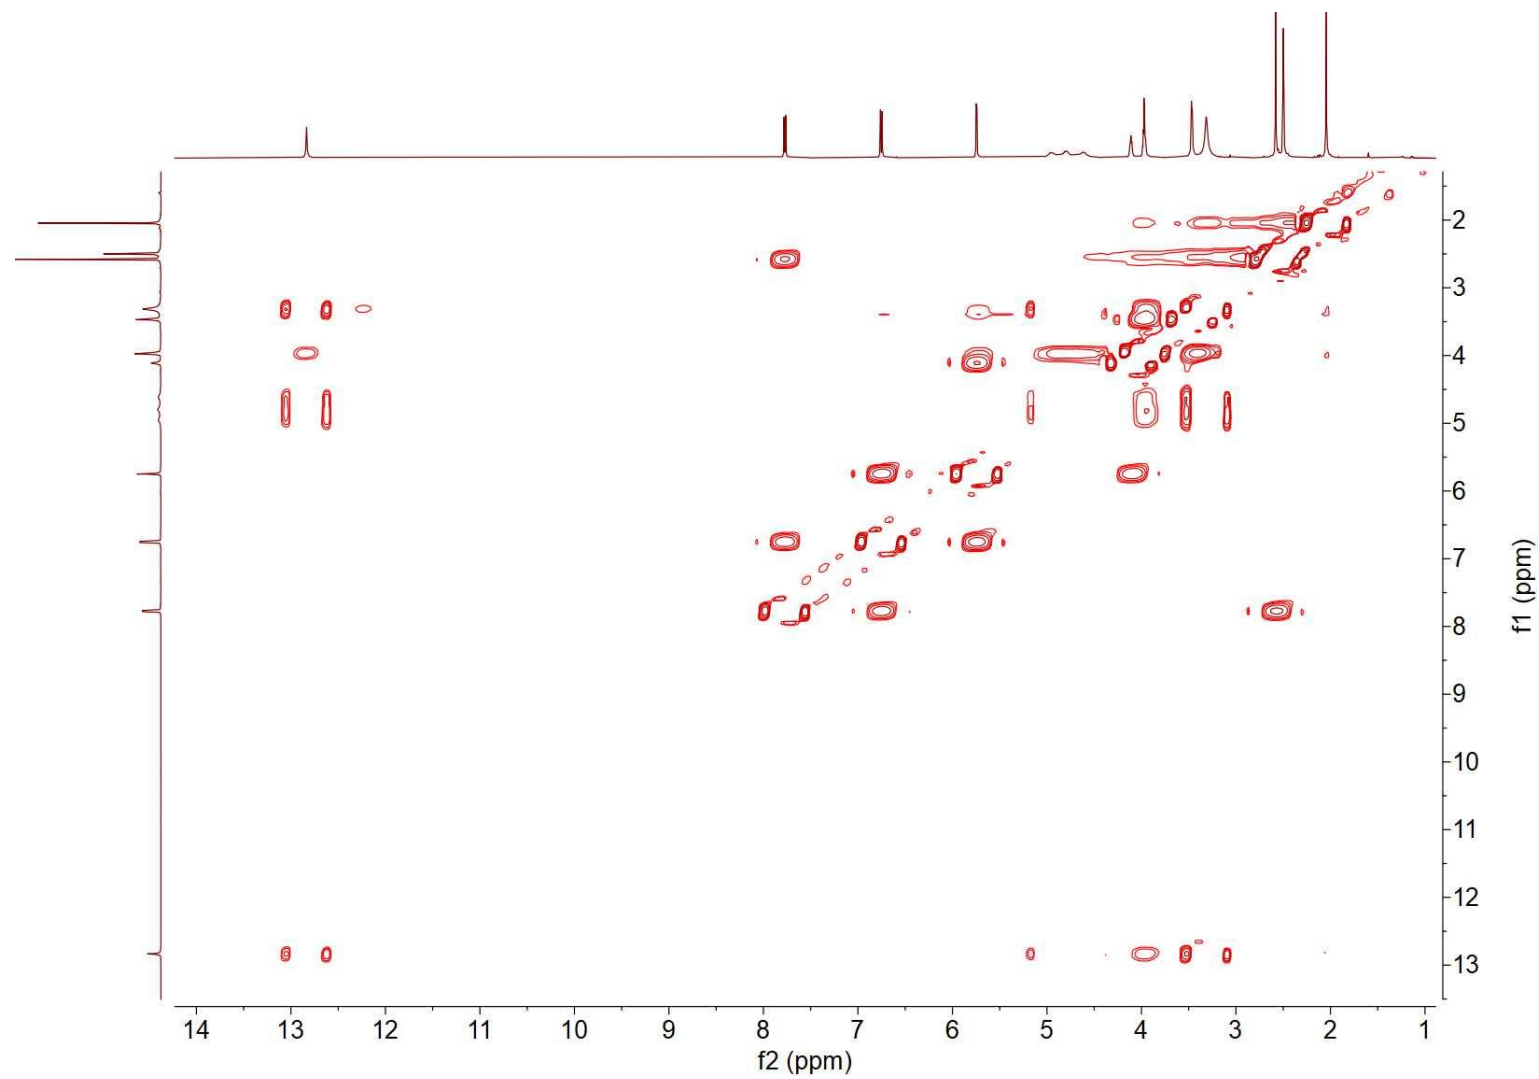

Figure S14. HRESIMS spectrum of compound **2**;

20210524-EN586-M-9\_210521102741 #47 RT: 0.55 AV: 1 SB: 6 0.03-0.11 NL: 8.42E5  
T: FTMS - c ESI Full ms [100.00-1500.00]

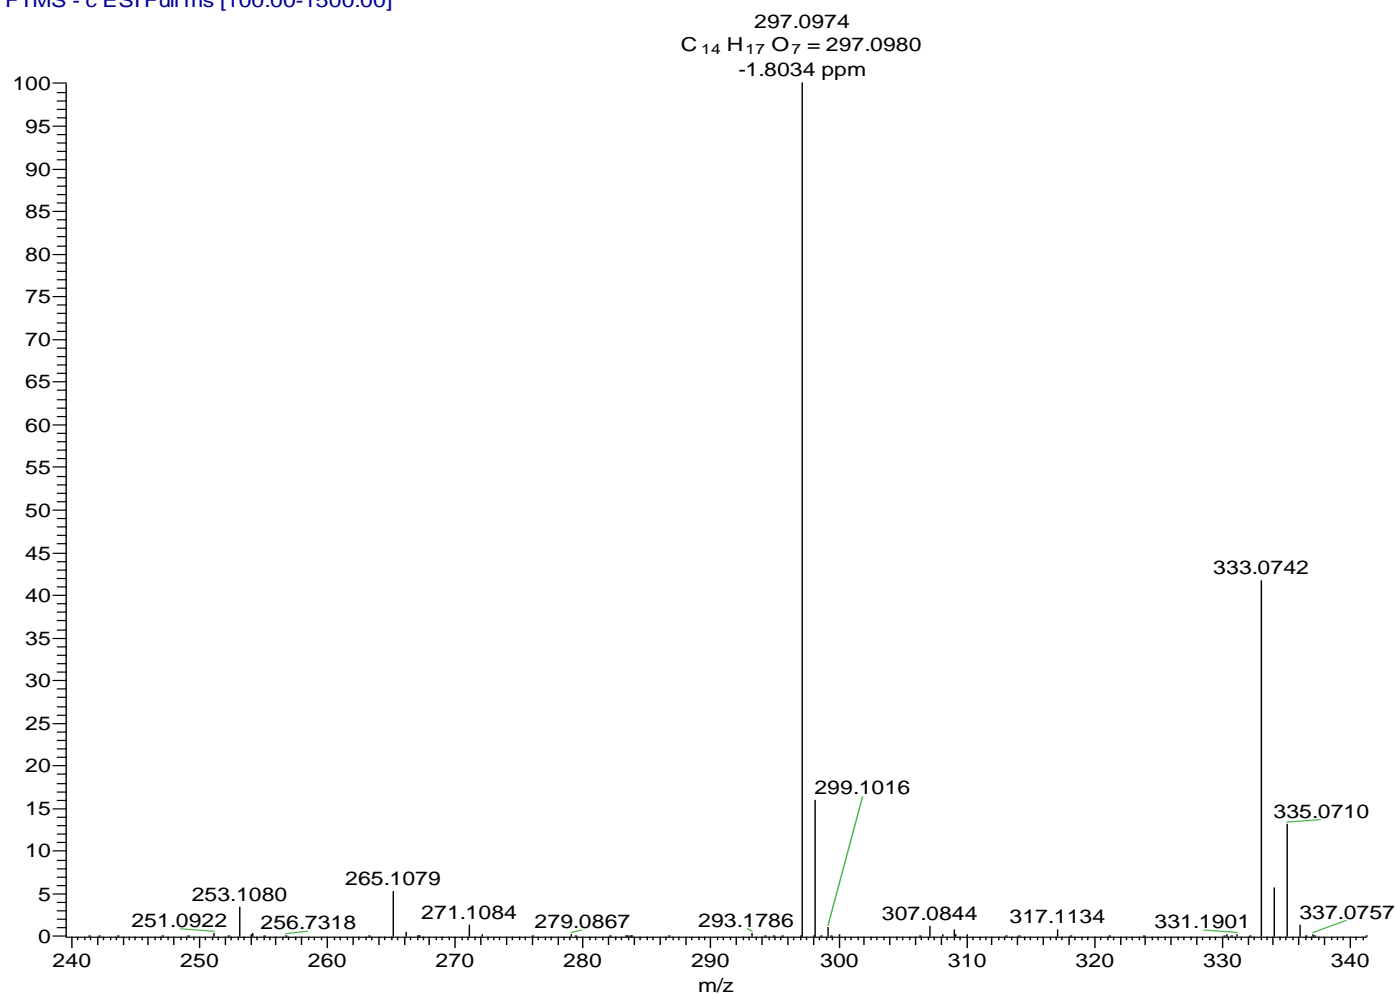

Figure S15. ECD spectrum of compound **2**;

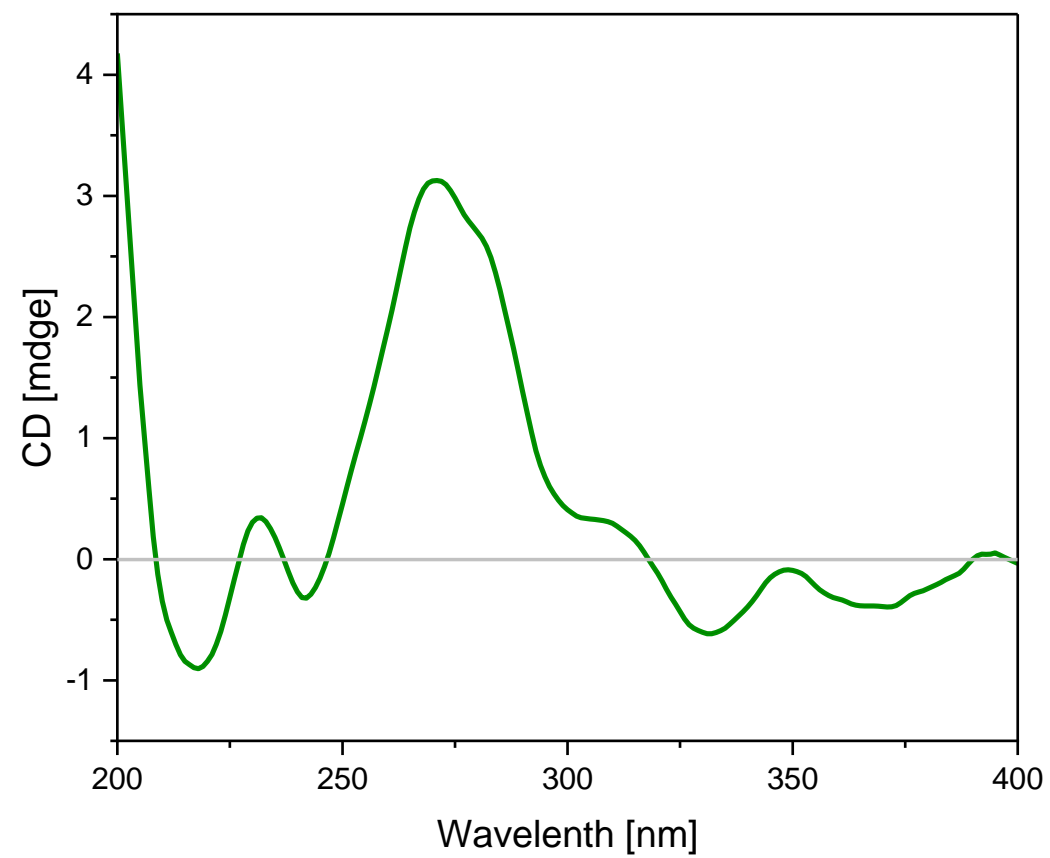

Figure S16.  $^1\text{H}$  NMR (500 MHz,  $\text{DMSO}-d_6$ ) spectrum of compound **3**;

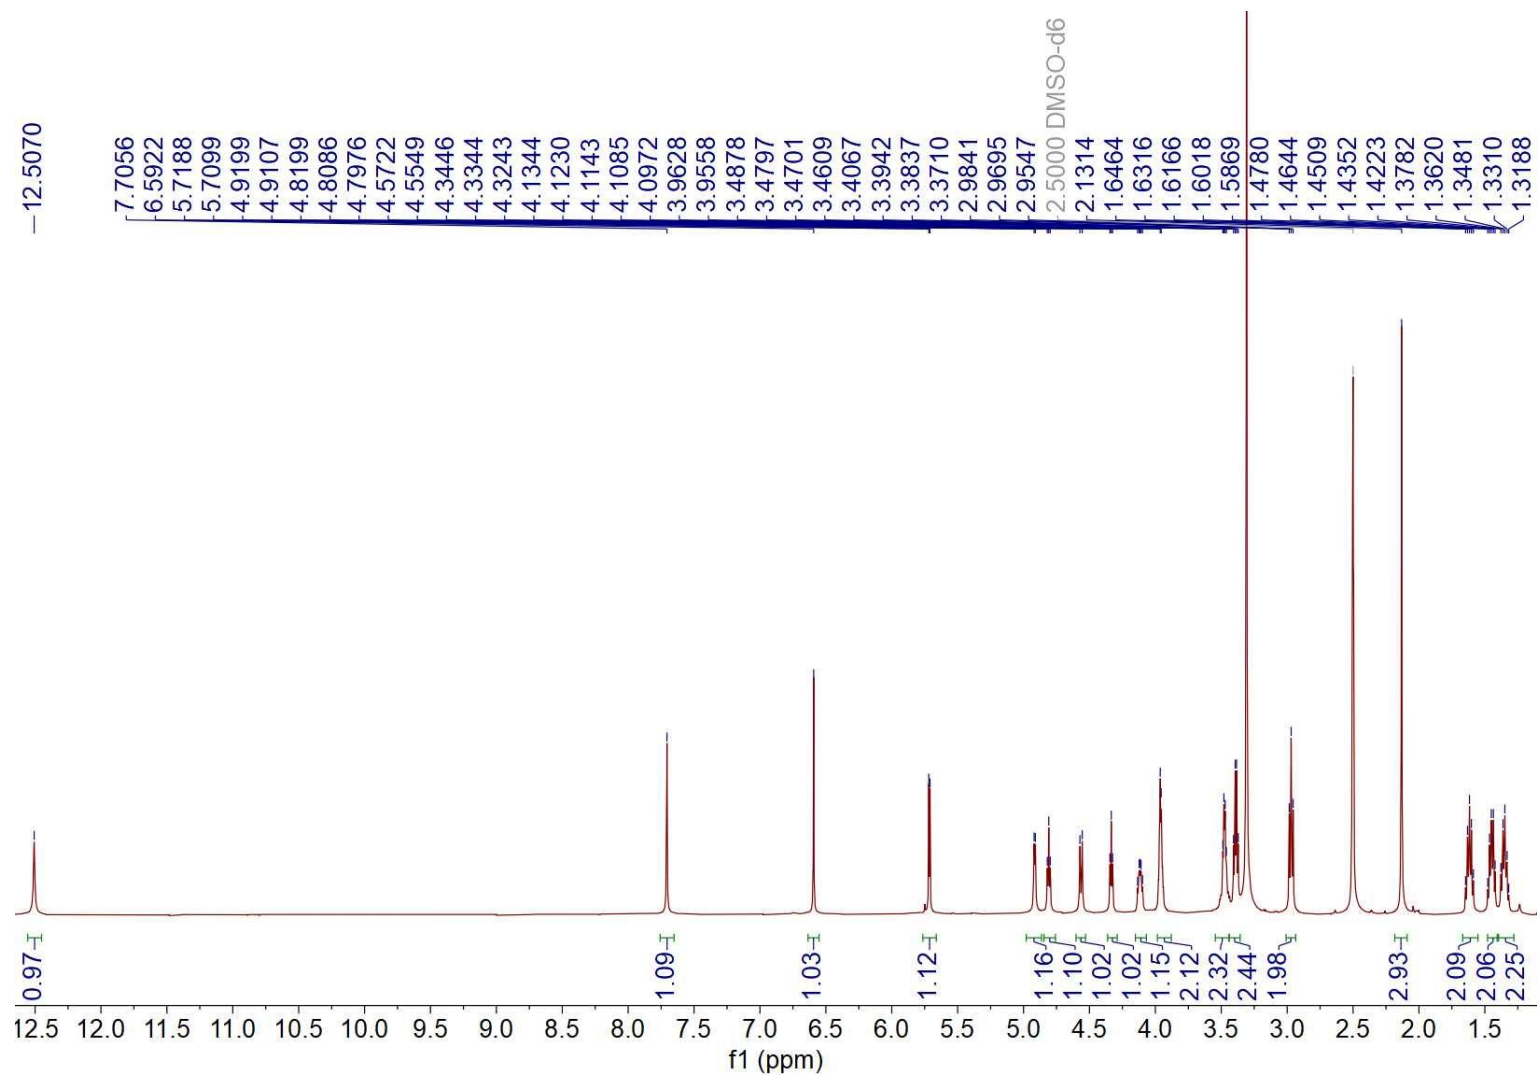

Figure S17.  $^{13}\text{C}$  NMR (125 MHz,  $\text{DMSO-}d_6$ ) and DEPT spectra of compound **3**;

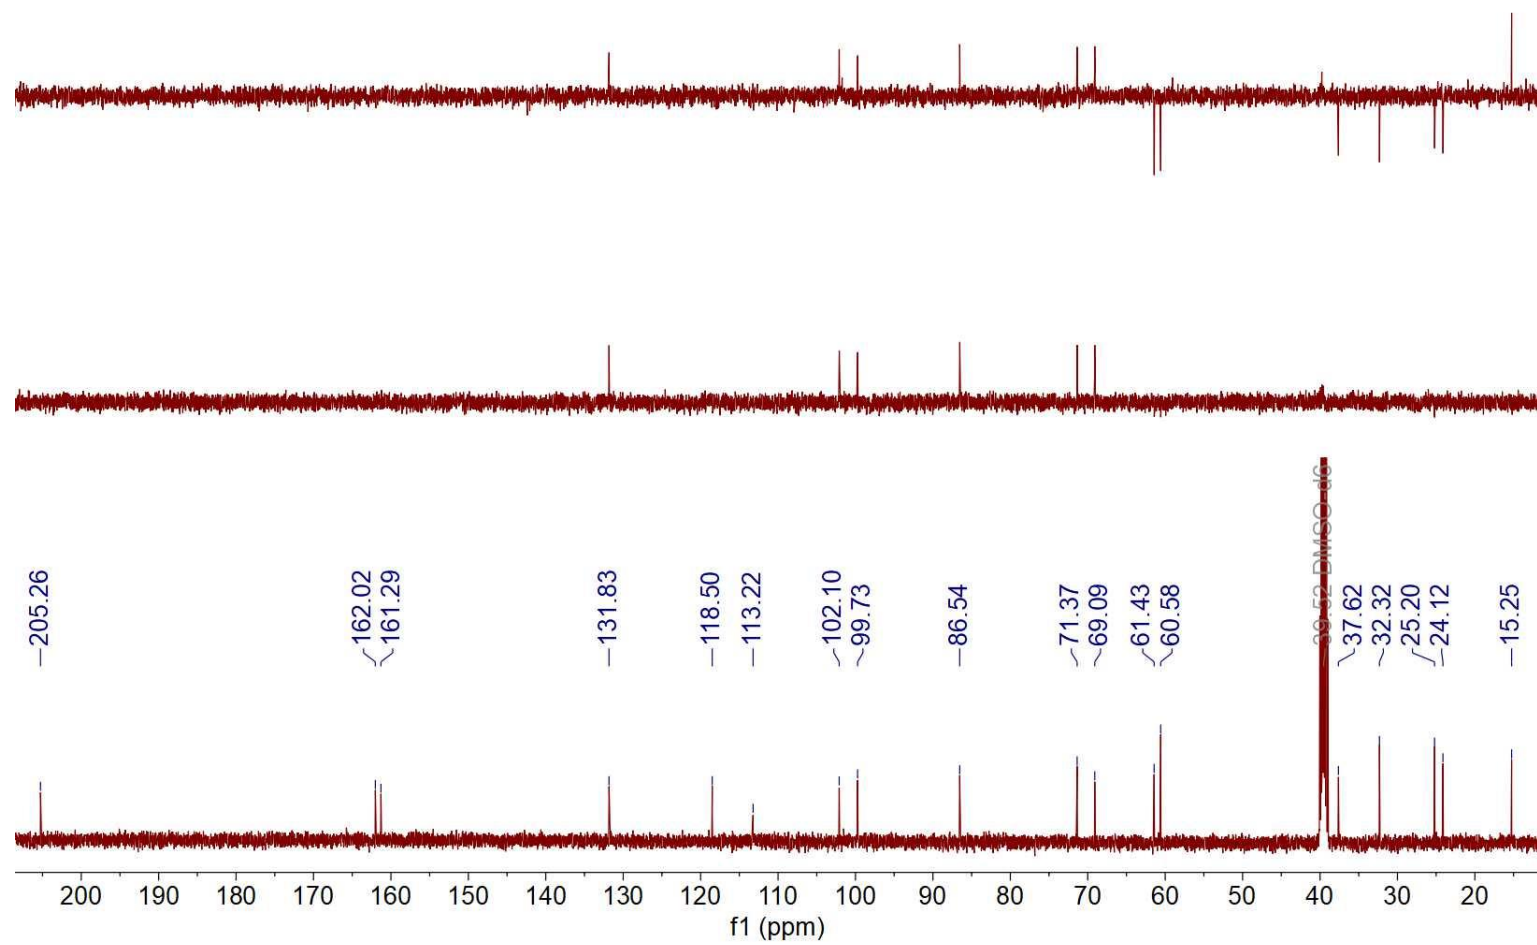

Figure S18. COSY spectrum of compound **3**;

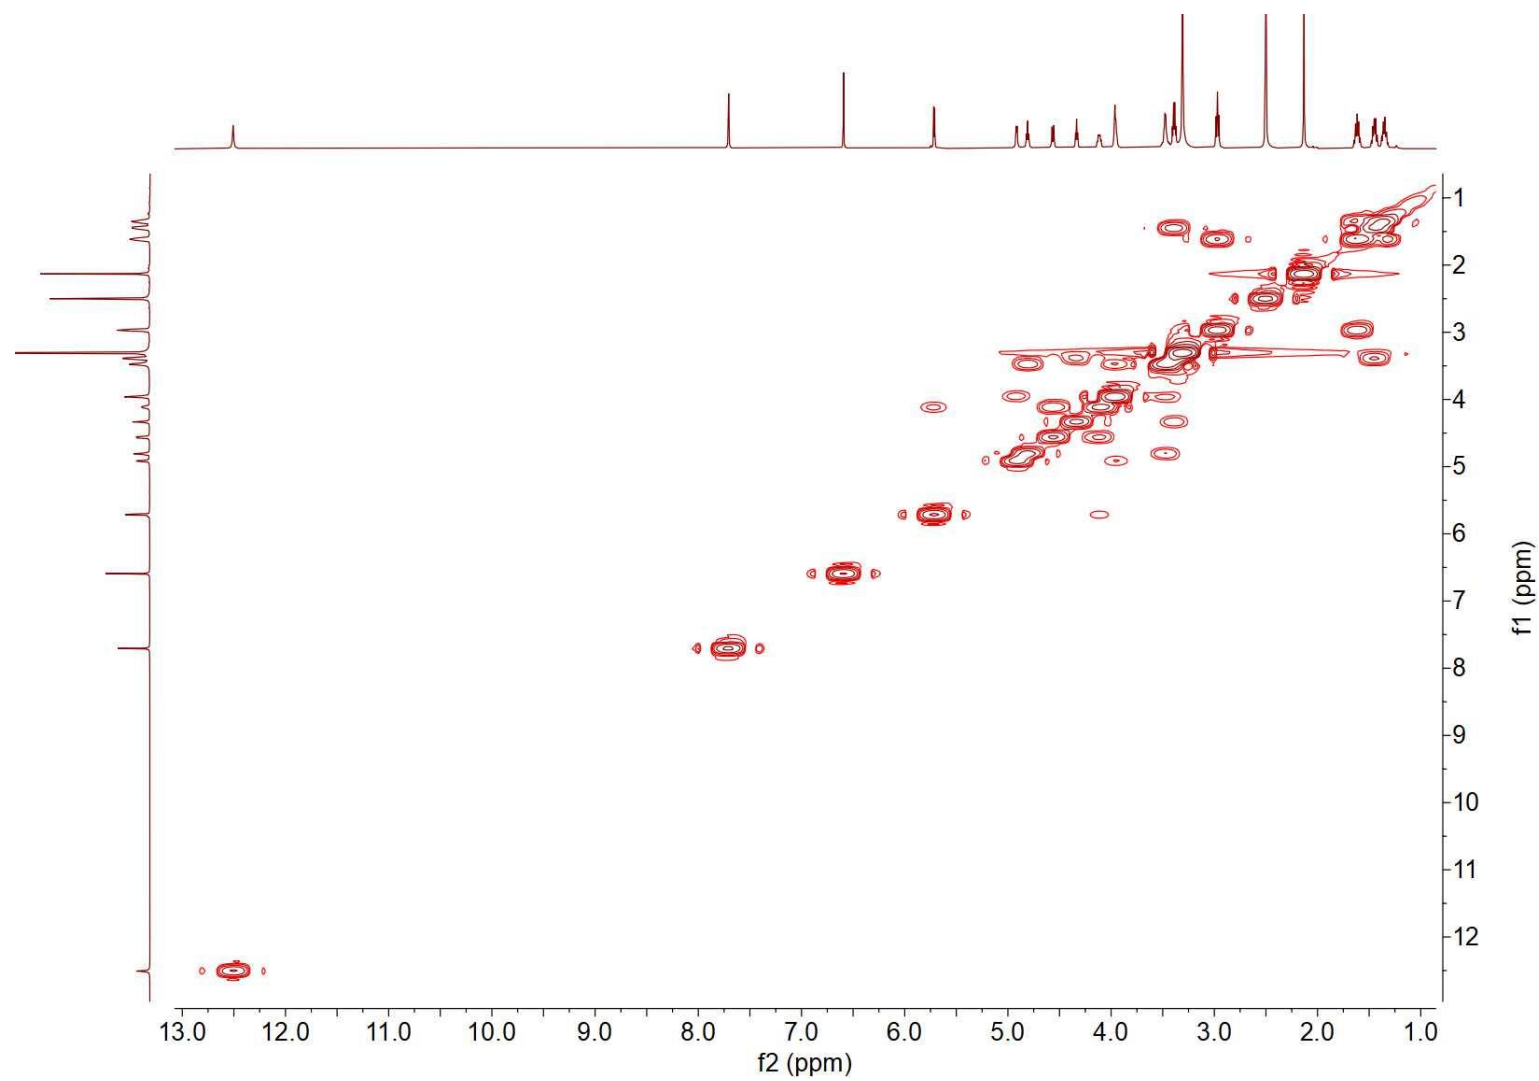

Figure S19. HSQC spectrum of compound **3**;

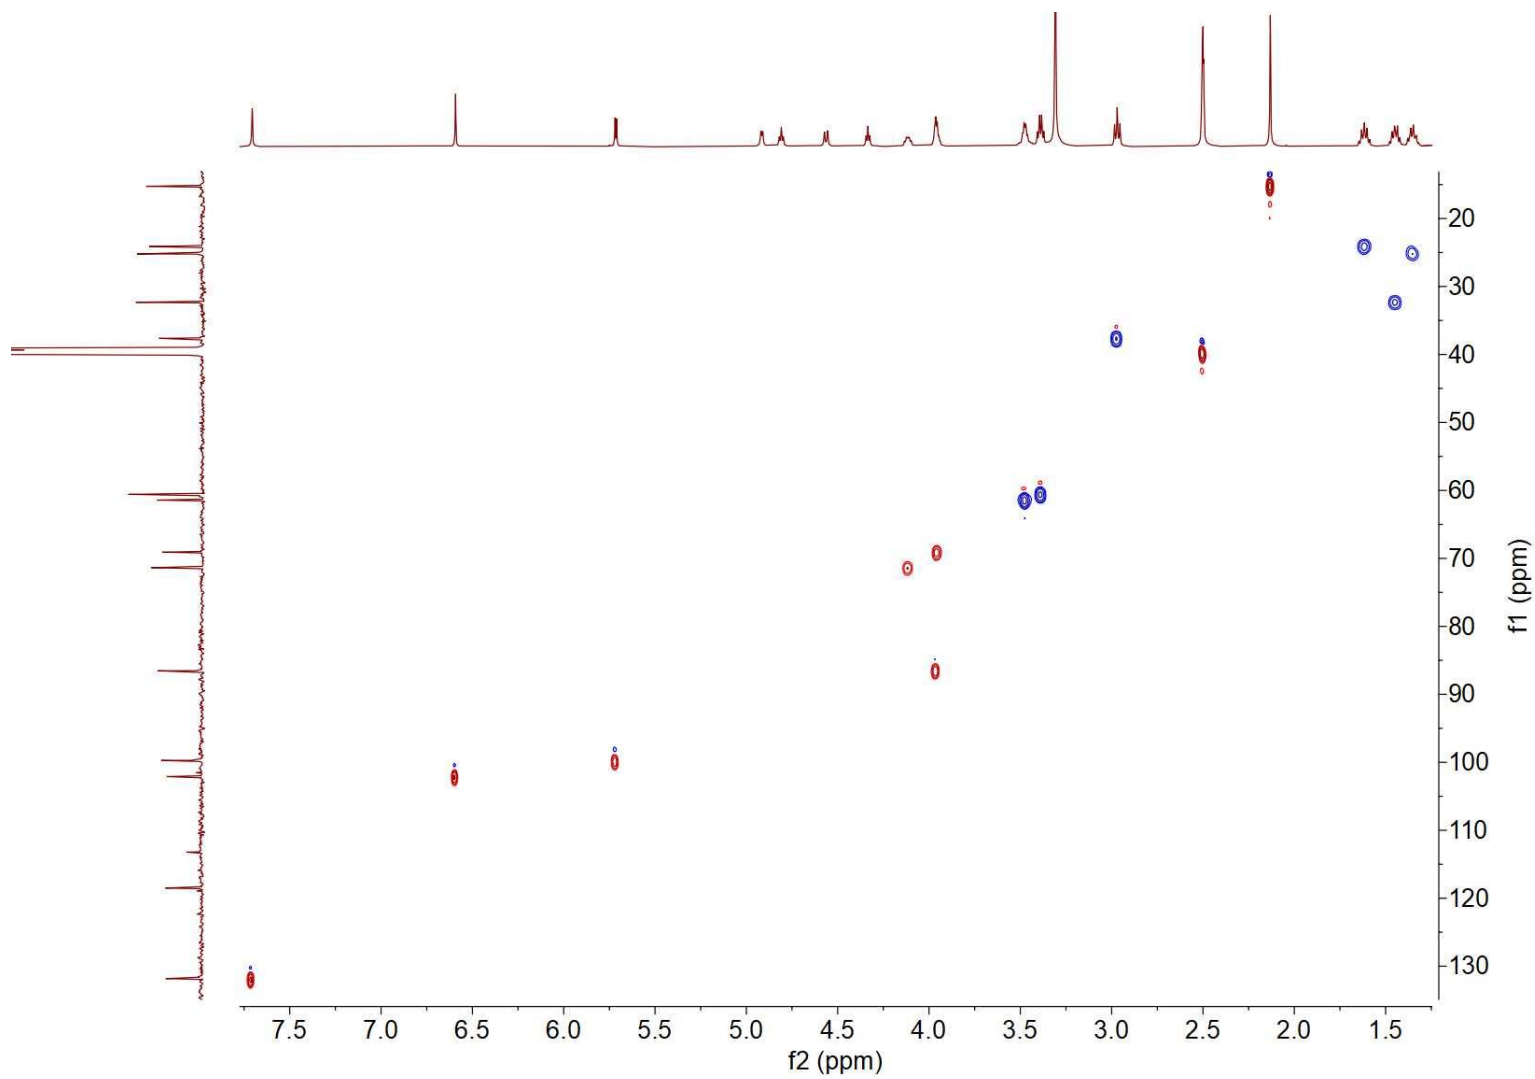

Figure S20. HMBC spectrum of compound **3**;

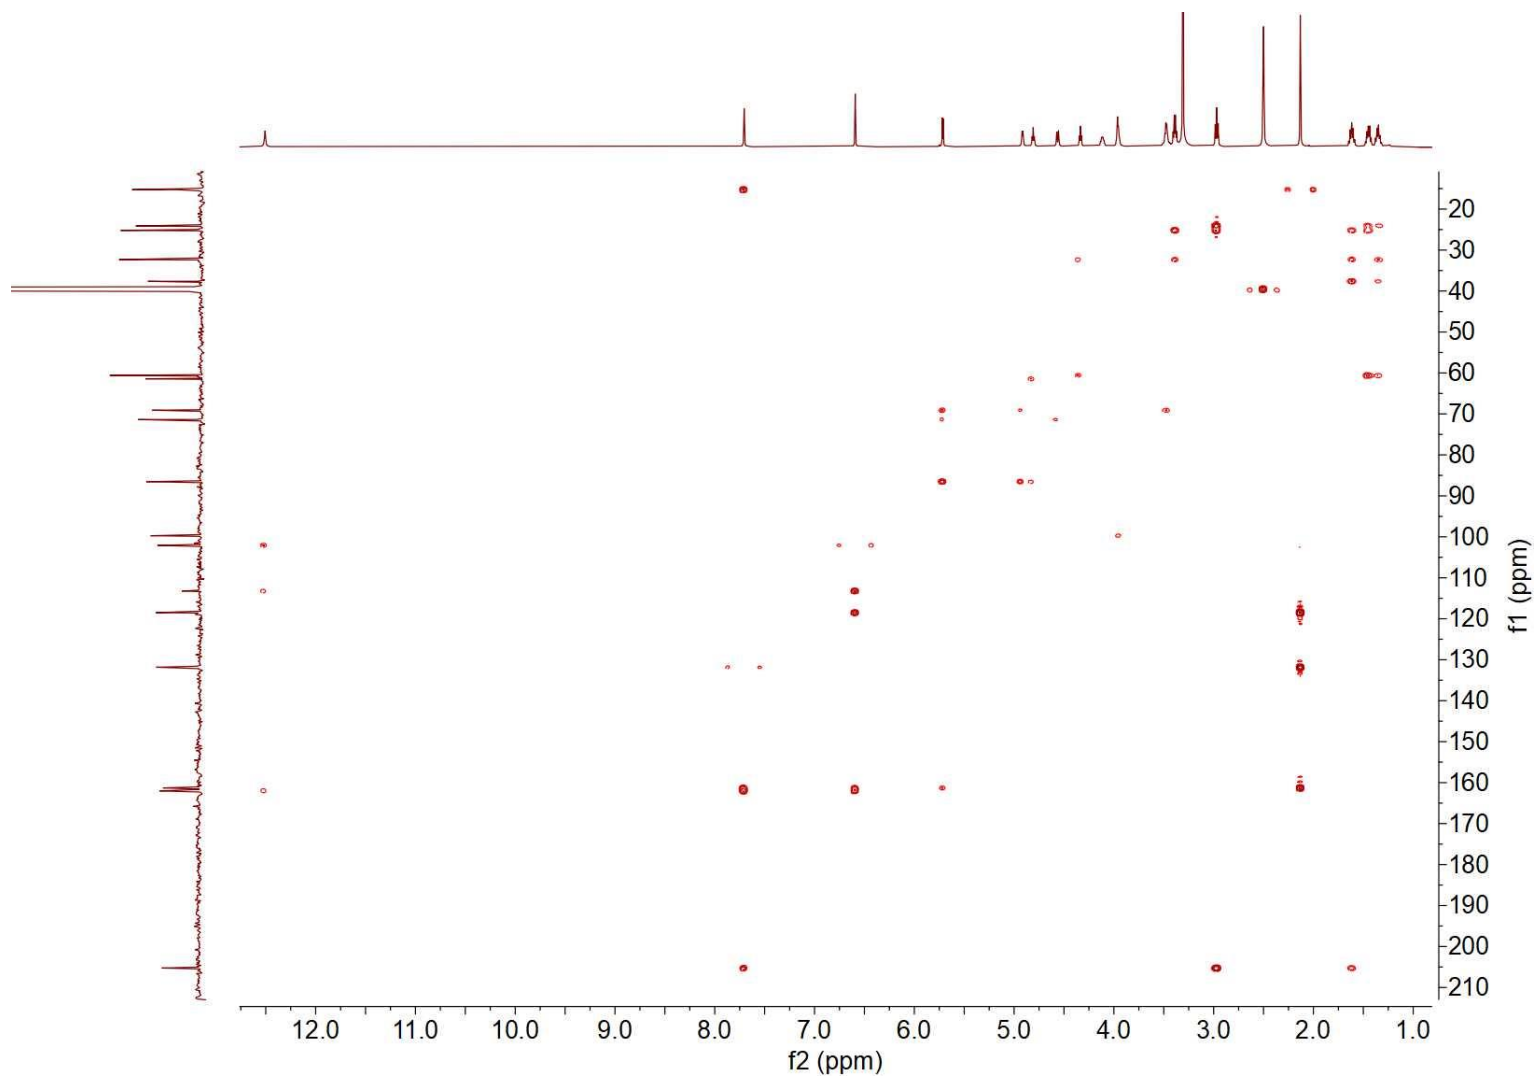



Figure S21. NOESY spectrum of compound **3**;

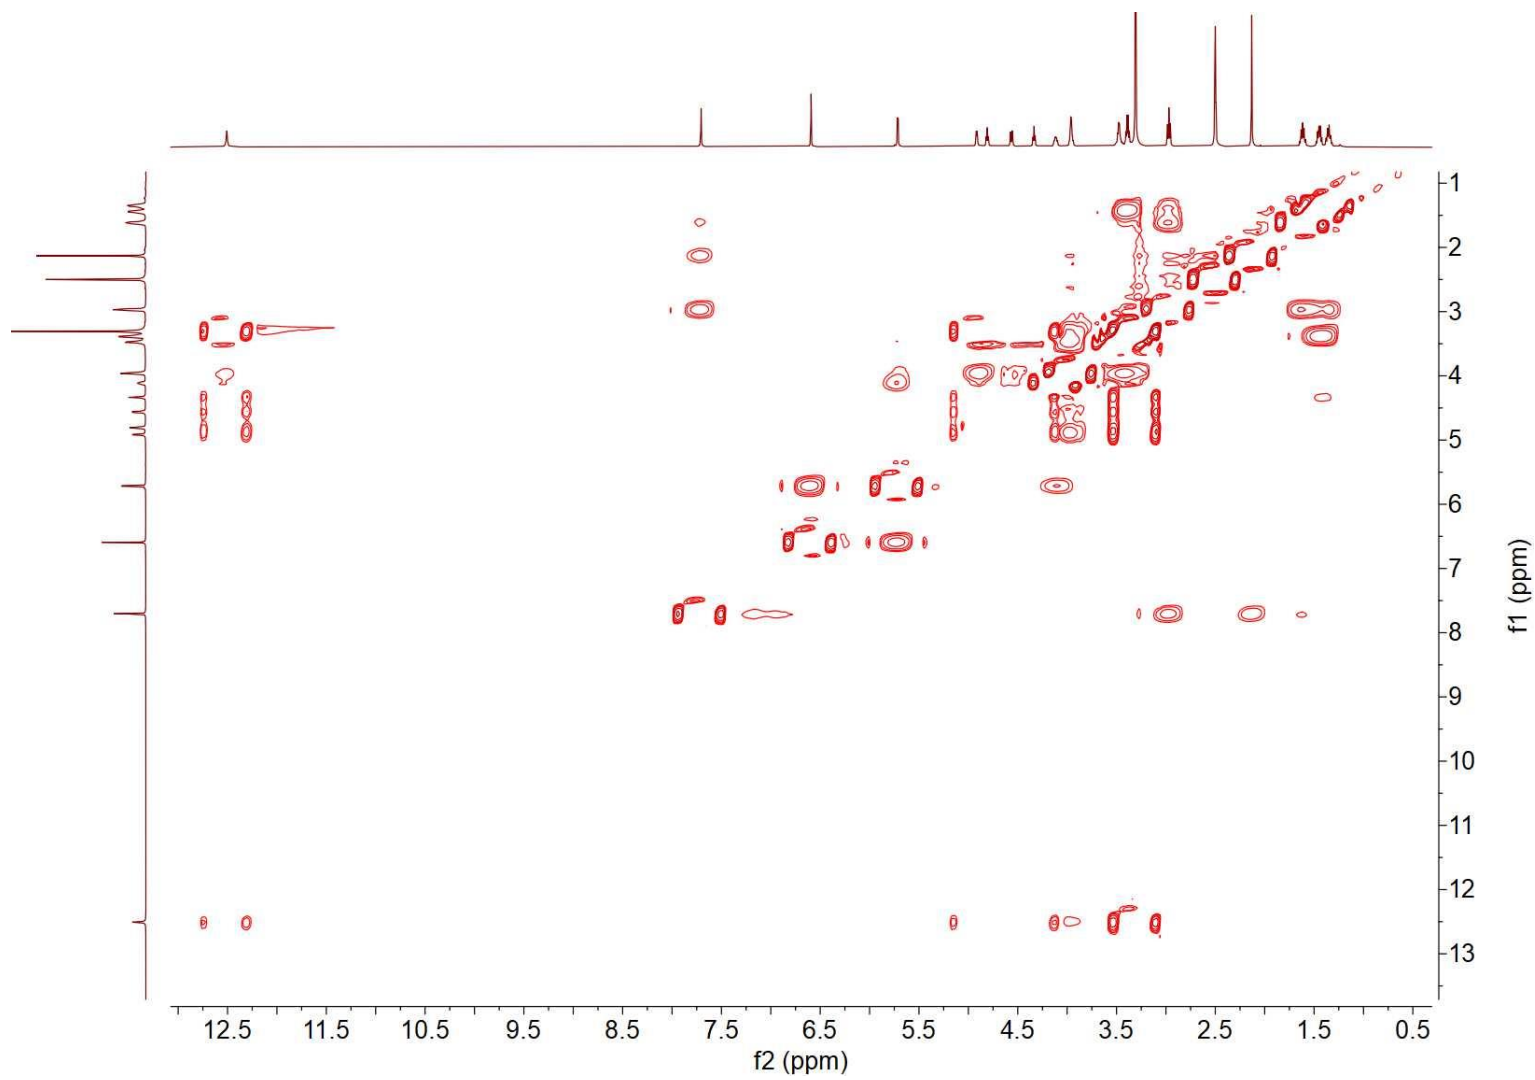

Figure S22. HRESIMS spectrum of compound **3**;

20201015-EN586M-14\_201015153826 #58 RT: 0.51 AV: 1 NL: 1.05E6  
T: FTMS + p ESI Full ms [200.00-1000.00]

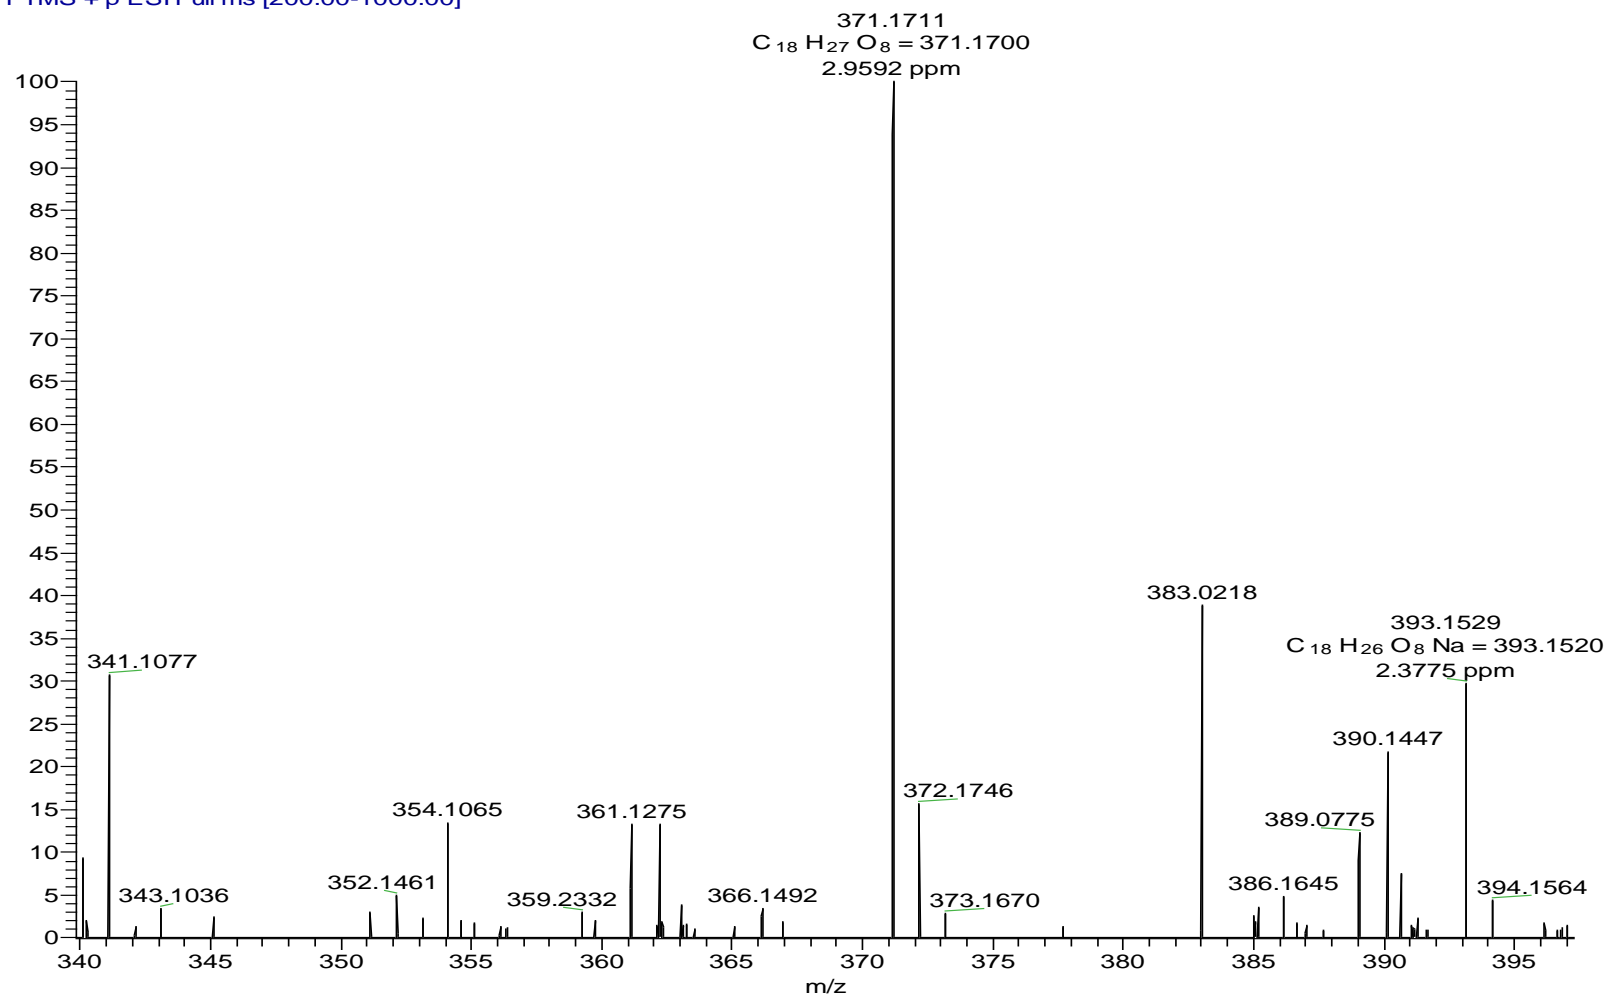

Figure S23. ECD spectrum of compound **3**;

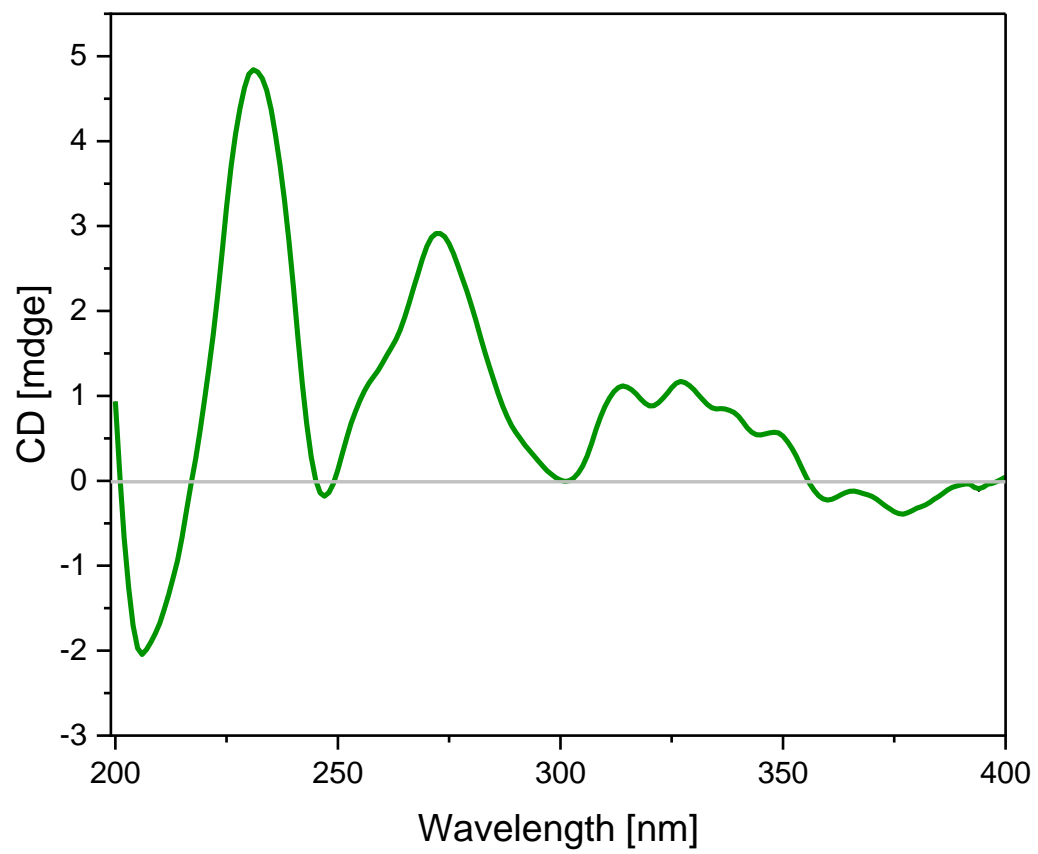

Figure S24. Determination of absolute configuration of glucosamine in compound **1**;

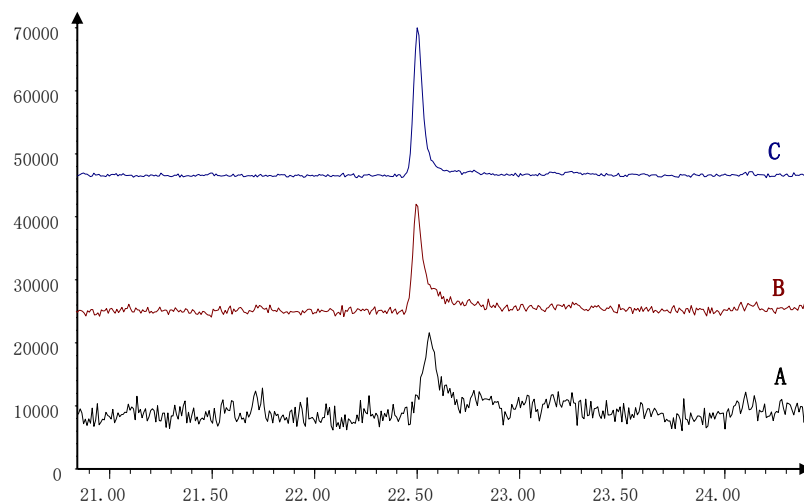

Note: The GC-MS analysis of the glucosamine derivatives (**A**: The derivative of glucosamine in compound **1**; **B**: The mixture of derivatives of glucosamine in compound **1** and authentic D-glucosamine; **C**: The derivative of authentic D-glucosamine).

Figure S25. DP4+ probability Excel sheets of compound **1**;

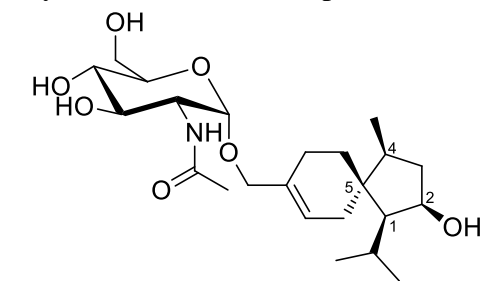

(1*S*,2*R*,4*S*,5*R*)-N-acetyl- $\alpha$ -D-glucosamine

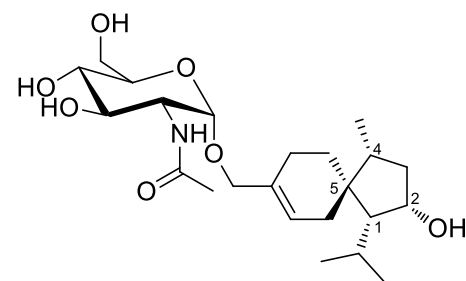

(1*R*,2*S*,4*R*,5*S*)-N-acetyl- $\alpha$ -D-glucosamine

| Functional |      | Solvent?   | Basis Set    |            | Type of Data      |          |          |
|------------|------|------------|--------------|------------|-------------------|----------|----------|
| mPW1PW91   |      | PCM        | 6-31+G (d,p) |            | Shielding Tensors |          |          |
|            |      | DP4+       | 0.00%        | 100.00%    | -                 | -        | -        |
| Nuclei     | sp2? | Experiment | Isomer 1     | Isomer 2   | Isomer 3          | Isomer 4 | Isomer 5 |
| C          | x    | 169.3      | 24.3166137   | 24.4077071 |                   |          |          |
| C          | x    | 137.3      | 63.5699984   | 64.9523235 |                   |          |          |
| C          | x    | 124.1      | 63.8332203   | 65.076381  |                   |          |          |
| C          |      | 96.1       | 103.651059   | 102.975603 |                   |          |          |
| C          |      | 72.9       | 118.005321   | 117.983168 |                   |          |          |
| C          |      | 70.8       | 120.472311   | 120.962248 |                   |          |          |
| C          |      | 70.6       | 122.056872   | 121.980299 |                   |          |          |
| C          |      | 66.6       | 122.889942   | 123.173169 |                   |          |          |
| C          |      | 64.6       | 126.355716   | 123.474468 |                   |          |          |
| C          |      | 60.8       | 130.646518   | 130.434294 |                   |          |          |
| C          |      | 59.3       | 135.462393   | 134.51151  |                   |          |          |
| C          |      | 53.9       | 139.907966   | 139.62949  |                   |          |          |
| C          |      | 46.2       | 145.415687   | 144.244513 |                   |          |          |
| C          |      | 44.2       | 147.789776   | 149.598763 |                   |          |          |
| C          |      | 34.5       | 151.412017   | 151.366522 |                   |          |          |
| C          |      | 31.8       | 157.26476    | 156.562598 |                   |          |          |
| C          |      | 29.8       | 167.267305   | 167.171924 |                   |          |          |
| C          |      | 28.5       | 168.901212   | 168.31543  |                   |          |          |
| C          |      | 26.2       | 170.087254   | 169.847795 |                   |          |          |
| C          |      | 23.3       | 171.579151   | 171.894095 |                   |          |          |
| C          |      | 22.8       | 172.839633   | 172.63111  |                   |          |          |
| C          |      | 22.6       | 174.208123   | 174.138205 |                   |          |          |
| C          |      | 14.2       | 179.521987   | 179.430524 |                   |          |          |
| H          |      | 1.24       | 30.6132119   | 30.257061  |                   |          |          |
| H          |      | 4.22       | 27.2244562   | 27.2186282 |                   |          |          |
| H          |      | 1.67       | 29.3771358   | 29.3333877 |                   |          |          |
| H          |      | 1.12       | 30.2527798   | 30.1968429 |                   |          |          |
| H          |      | 1.55       | 29.935926    | 29.9879207 |                   |          |          |
| H          |      | 2.07       | 28.5715588   | 28.908295  |                   |          |          |
| H          |      | 1.79       | 30.030048    | 29.6995326 |                   |          |          |
| H          | x    | 5.69       | 25.2587357   | 25.3261372 |                   |          |          |
| H          |      | 1.71       | 29.2193065   | 29.0910729 |                   |          |          |
| H          |      | 1.38       | 29.2550729   | 29.4906446 |                   |          |          |
| H          |      | 1.63       | 29.4363539   | 29.5137665 |                   |          |          |
| H          |      | 1.19       | 29.6975581   | 29.8416783 |                   |          |          |
| H          |      | 1.61       | 29.2099336   | 29.341043  |                   |          |          |
| H          |      | 0.88       | 30.579176    | 30.5786512 |                   |          |          |
| H          |      | 0.83       | 30.5527551   | 30.6690069 |                   |          |          |
| H          |      | 0.8        | 30.3862256   | 30.5328073 |                   |          |          |
| H          |      | 4.08       | 27.229672    | 27.1229    |                   |          |          |
| H          |      | 4.01       | 27.4160146   | 27.1677079 |                   |          |          |
| H          |      | 4.65       | 26.5650957   | 26.5322584 |                   |          |          |
| H          |      | 3.65       | 27.5649028   | 27.612099  |                   |          |          |
| H          |      | 3.45       | 27.7145171   | 27.7041915 |                   |          |          |
| H          |      | 3.14       | 28.1778677   | 28.2424148 |                   |          |          |
| H          |      | 3.39       | 27.6762096   | 27.651275  |                   |          |          |
| H          |      | 3.6        | 27.5629579   | 27.5753457 |                   |          |          |
| H          |      | 3.49       | 27.8202079   | 27.8261074 |                   |          |          |
| H          |      | 1.82       | 29.5116546   | 29.5168271 |                   |          |          |
| H          |      | 4.54       | 30.5714255   | 30.4902428 |                   |          |          |
| H          |      | 7.6        | 25.1202908   | 25.0864908 |                   |          |          |
| H          |      | 4.8        | 26.8530442   | 26.7345498 |                   |          |          |
| H          |      | 5.03       | 29.0048145   | 29.0133332 |                   |          |          |
| H          |      | 4.46       | 29.5367291   | 29.5526314 |                   |          |          |

Figure S26. Determination of absolute configuration of ribose in compound **3**;

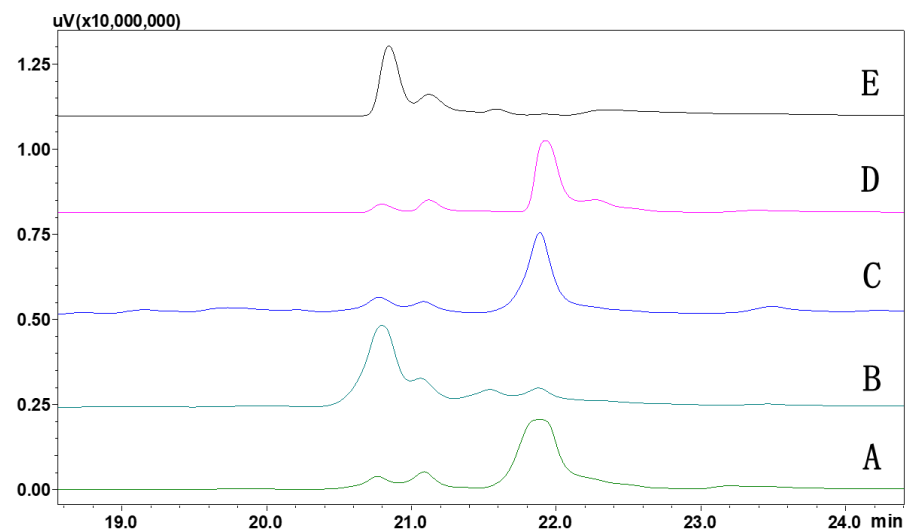

Note: The HPLC analysis of the ribose derivatives (**A**: The mixture of derivatives of the ribose in compound **3** and authentic D-ribose; **B**: The mixture of derivatives of the ribose in compound **3** and authentic L-ribose; **C**: The derivative of the ribose in compound **3**; **D**: The derivative of the authentic D-ribose; **E**: The derivative of the authentic L-ribose)
